# Massive colonization of protein-coding exons by selfish genetic elements in *Paramecium* germline genomes

*Short title:* Massive invasion of *Paramecium* genes by selfish genetic elements

Diamantis Sellis<sup>1#a¶</sup>, Frédéric Guérin<sup>2#b¶</sup>, Olivier Arnaiz<sup>3</sup>, Walker Pett<sup>1</sup>, Emmanuelle Lerat<sup>1</sup>, Nicole Boggetto<sup>2</sup>, Sascha Krenek<sup>4</sup>, Thomas Berendonk<sup>4</sup>, Arnaud Couloux<sup>5</sup>, Jean-Marc Aury<sup>5</sup>, Karine Labadie<sup>6</sup>, Sophie Malinsky<sup>7,8</sup>, Simran Bhullar<sup>7</sup>, Eric Meyer<sup>7</sup>, Linda Sperling<sup>3</sup>, Laurent Duret<sup>1&\*</sup>, Sandra Duhaucourt<sup>2&\*</sup>

<sup>1</sup> Université de Lyon, CNRS, Laboratoire de Biométrie et Biologie Evolutive UMR 5558, F-69100, Villeurbanne, France

<sup>2</sup> Université de Paris, Institut Jacques Monod, CNRS, F-75006 Paris, France

<sup>3</sup> Université Paris-Saclay, CEA, CNRS, Institute for Integrative Biology of the Cell (I2BC), 91198, Gif-sur-Yvette, France.

<sup>4</sup> TU Dresden, Institute of Hydrobiology, Dresden, Germany

<sup>5</sup> Génomique Métabolique, Genoscope, Institut de biologie François Jacob, CEA, CNRS, Université d'Évry, Université Paris-Saclay, F-91000 Evry, France.

<sup>6</sup> Genoscope, Institut de biologie François-Jacob, Commissariat à l'Energie Atomique (CEA), Université Paris-Saclay, F-91000 Evry, France.

<sup>7</sup> Institut de Biologie de l'Ecole Normale Supérieure (IBENS), Ecole Normale Supérieure, CNRS, INSERM, Université PSL, Paris, France.

<sup>8</sup> Université de Paris, F-75006 Paris, France

<sup>#a</sup>Current Address: CosmoTech, 5 Passage du Vercors 69007 Lyon, France

<sup>#b</sup>Current Address: Scipio bioscience, 92120 Montrouge, France

\* Corresponding authors

Emails: [sandra.duhaucourt@ijm.fr](mailto:sandra.duhaucourt@ijm.fr); [Laurent.Duret@univ-lyon1.fr](mailto:Laurent.Duret@univ-lyon1.fr)

¶These authors contributed equally to this work.

&These authors also contributed equally to this work.

## 33 Abstract

34 Ciliates are unicellular eukaryotes with both a germline genome and a somatic genome in the  
35 same cytoplasm. The somatic macronucleus (MAC), responsible for gene expression, is not  
36 sexually transmitted but develops from a copy of the germline micronucleus (MIC) at each  
37 sexual generation. In the MIC genome of *Paramecium tetraurelia*, genes are interrupted by tens  
38 of thousands of unique intervening sequences, called Internal Eliminated Sequences (IESs),  
39 that have to be precisely excised during the development of the new MAC to restore functional  
40 genes. To understand the evolutionary origin of this peculiar genomic architecture, we  
41 sequenced the MIC genomes of nine *Paramecium* species (from ~100 Mb in *P. aurelia* species  
42 to > 1.5 Gb in *P. caudatum*). We detected several waves of IES gains, both in ancestral and in  
43 more recent lineages. Remarkably, we identified 24 families of mobile IESs that generated tens  
44 to thousands of new copies. The most active families show the signature of horizontal transfer.  
45 These examples illustrate how mobile elements can account for the massive proliferation of  
46 IESs in the germline genomes of *Paramecium*, both in non-coding regions and within exons.  
47 We also provide evidence that IESs represent a substantial burden for their host, presumably  
48 because of excision errors. Interestingly, we observe that IES excision pathways vary according  
49 to the age of IESs, and that older IESs tend to be more efficiently excised. This suggests that  
50 once fixed in the genome, the presence of IESs imposes a selective pressure on their host, both  
51 in *cis* (on the excision signals of each IES) and in *trans* (on the cellular excision machinery), to  
52 ensure efficient and precise removal. Finally, we identified 69 IESs that are under strong  
53 purifying selection across the *P. aurelia* clade, which indicates that a small fraction of IESs  
54 provides a function beneficial for their host. Similar to the evolution of introns in eukaryotes,  
55 the colonization of *Paramecium* genes by IESs highlights the major role played by selfish  
56 genetic elements in shaping the complexity of genome architecture and gene expression.  
57

## 58 Introduction

59  
60 In multicellular organisms, the division of labor between transmission and expression of the  
61 genome is achieved by separation of germline and somatic cells. Such a division is also  
62 observed in some unicellular eukaryotes, including ciliates [1]. The ciliate *Paramecium*  
63 *tetraurelia* separates germline and somatic functions into distinct nuclei in the same cell.  
64 Somatic functions are supported by the highly polyploid macronucleus (MAC) that is  
65 streamlined for gene expression and destroyed at each sexual cycle. Germline functions are  
66 ensured by two small, diploid micronuclei (MIC) that are transcriptionally silent during  
67 vegetative growth. During sexual events, the MICs undergo meiosis and transmit the germline  
68 genome to the zygotic nucleus. New MICs and new MACs differentiate from mitotic copies of  
69 the zygotic nucleus. MAC differentiation involves massive and reproducible DNA elimination  
70 events (for review: [2,3]). In addition to the variable elimination of large regions containing  
71 repeats, ~45,000 unique, short, interspersed Internal Eliminated Sequences (IESs) are precisely  
72 removed from intergenic and coding regions [4,5]. Precise excision of IESs at the nucleotide  
73 level is essential to restore functional cellular genes, since 80% of the IESs are inserted within  
74 protein-coding genes, and about half of the ~40,000 genes are interrupted by IESs. IESs are  
75 invariably bounded by two 5'-TA-3' dinucleotides, one of which is left at the junction in the  
76 MAC genome after excision. IES excision in the developing MAC is initiated by DNA double-  
77 strand breaks at IES ends by the endonuclease PiggyMac (Pgm) assisted by other proteins,  
78 which are likely part of the excision machinery or interact with it [6–9].  
79

80 Despite significant progress in characterization of the mechanisms underlying IES elimination,  
81 the evolutionary origin of IESs remains mysterious. On the basis of sequence similarities

82 between the consensus found adjacent to the TA dinucleotide at IES ends and the extremities  
83 of DNA transposons from the IS630-Tc1-mariner (ITm) superfamily, Klobutcher and Herrick  
84 hypothesized that IESs might be degenerated remnants of transposable elements (TEs)[10,11].  
85 This hypothesis was further substantiated by the discovery that the endonuclease responsible  
86 for IES excision in *P. tetraurelia* is encoded by a domesticated PiggyBac transposase [6],  
87 assisted by a related family of catalytically inactive transposases [7]. All-by-all sequence  
88 comparison of the *P. tetraurelia* 45,000 IESs and of their flanking sequences identified eight  
89 families of “mobile IESs” (2 to 6 copies), *i.e.* homologous IESs inserted at non-homologous  
90 sites in the genome [4]. One such family (with 6 copies) was found similar to the Terminal  
91 Inverted Repeats of *Thon*, a DNA transposon of the ITm superfamily, indicating that some IESs  
92 behave as non-autonomous TEs [4]. These cases provided support to the notion that at least  
93 some IESs have derived from recently mobilized elements. However, the rather small number  
94 of mobile IESs detected (23 copies out of 45,000 IESs) suggested a limited activity of  
95 transposable IESs in the recent evolutionary history of the *P. tetraurelia* lineage [4]. There is  
96 also evidence that some IESs originated from MAC sequences, as described for instance for the  
97 IESs involved in mating type determination in several species [12,13]. The extent to which the  
98 45,000 IESs detected in *P. tetraurelia* derive from TEs or from MAC sequences therefore  
99 remained unclear.

100  
101 In order to gain insight concerning the evolutionary origin of IESs in the *Paramecium* lineage,  
102 we adopted a comparative genomic approach. *P. tetraurelia* belongs to the *Paramecium aurelia*  
103 group of species that comprises over a dozen morphologically similar yet genetically isolated  
104 species [14–17]. Here, we selected eight *P. aurelia* species and one outgroup (*P. caudatum*),  
105 and sequenced their germline MIC genomes. Comparison of the IES repertoire across these  
106 nine species revealed that IES gains and losses occurred throughout the whole evolutionary  
107 history of that clade, with two major waves of insertions: one ancestral wave at the base of the  
108 *P. aurelia* clade and one recent wave, specific to the *P. sonneborni* lineage. The analysis of this  
109 recent wave revealed thousands of IESs corresponding to mobile elements acquired via  
110 horizontal transfer, thus providing the first direct evidence that a majority of IESs can derive  
111 from TEs. We also found evidence that IESs represent a substantial burden for their host,  
112 because of sub-optimal efficiency of the IES excision process. The comparison of IESs  
113 according to their age of origin indicates that over time, IESs shorten and acquire features that  
114 allow them to be more efficiently excised. Interestingly, although most IESs diverge very  
115 rapidly, we identified 69 IESs that are under strong purifying selection across the *aurelia* clade,  
116 which indicates that some IESs provide a function beneficial for their host. The evolutionary  
117 history of *Paramecium* IESs is thus reminiscent of the evolutionary history of introns in  
118 eukaryotes: selfish mobile elements found a way to invade coding regions and ultimately had a  
119 major impact on the biology of the cell and the architecture of its genome.

120

## 121 Results

122

123 Sequencing of somatic and germline genomes in nine *Paramecium* species: gigantic germline  
124 genome in *P. caudatum*

125 In order to examine the evolutionary trajectories of IESs in the *Paramecium* lineage, we  
126 sequenced the germline MIC genome and the somatic MAC genome of several *Paramecium*  
127 species. We selected 8 species from the *Paramecium aurelia* complex and one outgroup  
128 species, *P. caudatum*, which diverged from the *aurelia* complex before the two most recent  
129 *Paramecium* whole genome duplications [15]. To sequence the germline MIC genome, we  
130 purified the germline nuclei (MICs) of each species using a flow cytometry procedure that we

131 previously developed for *P. tetraurelia* [5]. The strategy consists in a fractionation step to  
 132 obtain MIC-enriched samples from exponentially growing *Paramecium* vegetative cultures,  
 133 which are then subjected to sorting by flow cytometry (S1 Fig) (see Materials and Methods).  
 134 This allows the separation of the small, diploid MICs from the highly polyploid MAC and the  
 135 bacteria abundant in *Paramecium* cultures. MIC DNA was obtained from highly enriched  
 136 sorted nuclei (97-99%) for the nine selected *Paramecium* species and was used for paired-end  
 137 Illumina sequencing (see Materials and Methods and S1 Table).  
 138 The MAC genome of the same strains was sequenced as well for four species for which it was  
 139 not already available (S2 Table). In these four genome assemblies, we observed regions of low  
 140 coverage at the extremities of MAC scaffolds (S2 Fig). These regions (hereafter referred to as  
 141 ‘MAC-variable’ regions) result from the variability of programmed genome rearrangement  
 142 patterns during MAC development [18]. While most MIC loci are either fully eliminated during  
 143 MAC development (MIC-limited sequences) or fully retained (MAC-destined sequences),  
 144 MAC-variable regions correspond to DNA sequences that are not completely eliminated and  
 145 instead, are retained in a small fraction of MAC copies. MAC-variable regions represent ~15%  
 146 of the initial MAC genome assembly (see Materials and Methods and S2 Table). We decided  
 147 to define the ‘constitutive’ MAC genome as the DNA sequences retained in all MAC copies.  
 148 The size of the constitutive MAC genome assembly was similar among *P. aurelia* species (66-  
 149 73 Mb) with a noticeably larger size for *P. sonneborni* (83 Mb) (Table 1). The number of protein  
 150 coding genes follows a similar distribution (36,179 to 42,619) in *aurelia* species, with a larger  
 151 number of genes (49,951) in *P. sonneborni* (Table 1). This contrasts with the much smaller  
 152 MAC genome size (30.4 Mb) and number of genes (18,173) of the outgroup *P. caudatum* [15].  
 153

| Species (strain)                  | MIC genome size (Mb) |           | MAC-destined regions |                      |             |                          |
|-----------------------------------|----------------------|-----------|----------------------|----------------------|-------------|--------------------------|
|                                   | flow cytometry (a)   | k-mer (b) | size (Mb) (c)        | Nb. of protein genes | Nb. of IESs | IES density (per kb) (d) |
| <i>P. tetraurelia</i> (51)        | 151                  | 108 (160) | 70                   | 40,460               | 44,128      | 0.62                     |
| <i>P. octaurelia</i> (138)        | 175                  | 108       | 72.6                 | 44,398               | 44,509      | 0.61                     |
| <i>P. biaurelia</i> (V1-4)        | 179                  | 119       | 77                   | 40,261               | 45,384      | 0.65                     |
| <i>P. tredecaurelia</i> (209)     | 142                  | 127       | 66                   | 36,179               | 42,275      | 0.66                     |
| <i>P. pentaurelia</i> (87)        | 154                  | 112       | 72.7                 | 41,676               | 42,686      | 0.57                     |
| <i>P. primaurelia</i> (AZ9-3)     | 168                  | 114       | 73.5                 | 42,619               | 43,766      | 0.59                     |
| <i>P. sonneborni</i> (ATCC 30995) | 458                  | 286 (316) | 82.6                 | 49,951               | 60,198      | 1.05                     |
| <i>P. sexaurelia</i> (AZ8-4)      | 205                  | 123 (164) | 68.0                 | 36,094               | 47,002      | 0.70                     |
| <i>P. caudatum</i> (My43c3d)      | 1,659                | 1,300     | 30.5                 | 18,673               | (e) 8,762   | 0.47                     |

154 **Table 1. Characteristics of analyzed genomes.**

155 Species are ordered according to the phylogeny (Fig 1). MIC genome size (in Mb) was estimated based  
 156 on (a) flow cytometry analysis and (b) k-mer counts. Size estimation before correction, based on MAC  
 157 contamination, is indicated in parentheses (see Material and Methods). (c) Size of constitutive MAC  
 158 genome assembly. (d) The IES density was measured in MAC-destined sequences, after exclusion of  
 159 regions with insufficient MIC read depth (< 15X). (e) The sensitivity of IES detection in *P. caudatum*  
 160 was limited because of the relatively low sequencing depth of its MIC genome. Based on the IES density  
 161 observed in regions with sufficient read depth (see c), we estimate that the genome of *P. caudatum*  
 162 should contain about 15,000 IESs in MAC-destined regions.  
 163

164  
 165 To estimate the size of the MIC genomes, we employed two distinct approaches. First, we used  
 166 the MIC-enriched preparations from *Paramecium* cultures to yield values for DNA quantity in  
 167 the MICs by flow cytometry. We measured the absolute DNA content in the nuclei with  
 168 propidium iodide, a fluorophore that is insensitive to differences in base composition, and

169 compared DNA content of MIC-enriched preparations to a standard (tomato nuclei) of known  
170 genome size (see Materials and Methods and S1 Data). The estimated MIC genome sizes are  
171 within a similar range (140-173 Mb) for the *P. aurelia* species, except for *P. sonneborni* (Table  
172 1). The genome size of *P. sonneborni* (448 Mb) was estimated to be roughly the double of the  
173 others. The second, independent approach for genome size estimations was based on the  
174 sequence reads themselves and used the k-mer method described in [19,20]. It assumes that the  
175 total number of k-mers (in this case 17-mers) divided by the sequencing depth is a good  
176 approximation for genome size (see Materials and Methods). As shown in S2 Table, the  
177 estimated MAC genome sizes were in good agreement with the size of the constitutive MAC  
178 genome assemblies. The MIC genome sizes estimated by the k-mer method were comprised  
179 between 108 Mb to 123 Mb for the *aurelia* species, with a considerably larger MIC genome  
180 (283 Mb) for *P. sonneborni* (Table 1). While the values obtained using the flow cytometry  
181 method were greater than those with the k-mer method, the estimated MIC genome sizes were  
182 within a similar range for both methods (150 Mb with flow cytometry versus 120 Mb with k-  
183 mer for *aurelia*, a roughly double size for *P. sonneborni*) (S3 Fig).

184  
185 With both methods, the estimated MIC genome size of *P. caudatum* strain My43c3d was the  
186 largest among the species analyzed (app. 1,300-1,600 Mb). To confirm this observation, we  
187 estimated the genome size of other *P. caudatum* strains, performing the same flow cytometry  
188 analysis with MIC-enriched preparations for 9 additional strains. We chose 8 strains that belong  
189 to the two major clades A and B described in the *caudatum* lineage, as well as another divergent  
190 strain [21]. The data confirmed that the MIC genome size in the *caudatum* lineage is far bigger  
191 than that in the *aurelia* lineage and revealed great variations of genome size among the different  
192 strains (from 1,600 Mb to 5,500 Mb), even within the same clade (S1 Data). To investigate the  
193 composition of the gigantic *caudatum* genomes, we searched for the presence of repeats in the  
194 MIC sequence reads of strain My43c3d. We identified two major satellite repeats, Sat1 and  
195 Sat2 (332 bp and 449 bp, respectively), which represent 42% and 29% respectively of the MIC  
196 genome (S4 Fig). To look for the presence of these two satellite repeats in the other *P. caudatum*  
197 strains, we performed PCR amplification on whole cell DNA with specific primers for each  
198 repeat. Both Sat1 and Sat2 repeats were detected in the *P. caudatum* strains of the clade B, to  
199 which the strain My43c3d belongs (S4 Fig). In contrast, these repeats were not amplified in the  
200 other *P. caudatum* strains (S4 Fig), indicating that they are not shared by all *P. caudatum* strains  
201 and most likely invaded the MIC genome after the divergence between clades A and B.

202  
203 In conclusion, the eight species of the *aurelia* complex that we analyzed share similar genome  
204 characteristics, with a MIC genome of ~110-160 Mb, 50-70% of which is retained during MAC  
205 development (~70-80 Mb). The only notable exception is *P. sonneborni*, with a 300-400 Mb  
206 MIC genome, of which about 25% is retained in its MAC. The MIC genome of the outgroup  
207 *P. caudatum* is much larger (~1,300-1,600 Mb). Only 2% of MIC sequences are retained in the  
208 MAC of *P. caudatum* strain My43c3d and 83% of the MIC-specific sequences consist of  
209 repeated DNA (S4 Fig).

210  
211 IES repertoire

212 IESs were identified by comparing MIC sequence reads to the MAC genome assembly (see  
213 Materials and Methods; [4,22]). Overall, the number of detected IESs in MAC-destined  
214 sequences is similar across *Paramecium* species (~42,000-47,000 IESs), with the exception of  
215 *P. sonneborni* (~60,000 IESs) and *P. caudatum* (~9,000 IESs). It should be noted that the  
216 sensitivity of IES detection was limited in *P. caudatum*, due the reduced MIC sequencing depth  
217 (13X), resulting from the unexpected huge size of the MIC genome. To circumvent this issue,  
218 we compared the IES density across species by taking into account only IESs annotated in

219 regions with at least 15X depth of MIC sequence reads mapped onto the MAC assembled  
220 genome (Table 1): in *P. caudatum*, the density of detected IES sites in MAC-destined regions  
221 (0.5 IESs per kb) is only slightly lower than in other species (~0.6 IESs per kb). This suggests  
222 that the genome of *P. caudatum* probably contains about 15,000 IESs in its MAC-destined  
223 regions.

224 Our approach is designed to identify IESs only if they are present within loci retained in the  
225 MAC. Hence, IESs located in MIC-specific regions (e.g., IESs nested within other IESs  
226 [23,24]) remain undetected. Interestingly, in four species whose MAC genome was sequenced  
227 at very high depth (*P. octaurelia*, *P. primaurelia*, *P. pentaurelia* and *P. sonneborni*), the initial  
228 MAC genome assemblies included 10 to 16 Mb of MAC-variable regions (see above). We  
229 identified many IESs in these regions, at a density (0.4 to 0.5 IESs per kb, S2 Table) nearly as  
230 high as in MAC-destined regions (Table 1). This suggests that in addition to IESs located in  
231 MAC-destined regions, many other IESs are present within MIC-specific regions.

232  
233 In all species, the vast majority of IESs in MAC-destined regions (73% to 81%) are located in  
234 protein-coding exons and ~5% are located in introns. Overall, there is a slight enrichment of  
235 IESs within genes (on average, protein-coding genes represent 78% of MAC genomes, and  
236 contain 83% of the IESs; S3 Table). This enrichment is not true for all gene categories. In  
237 particular, we observed a depletion of IESs in highly expressed genes: on average, the IES  
238 density in the top 10% most expressed genes is 37% lower than in the bottom 10% (S5 Fig).  
239 This pattern, consistent with previous observations in *P. tetraurelia*, suggests that IES  
240 insertions are counter-selected in highly expressed genes [4].

241

#### 242 Age distribution of IESs

243 In order to explore the origin and evolution of IESs, we resolved the phylogenetic relationship  
244 among the sequenced species. To do so, we classified all protein sequences into families  
245 (N=13,617 gene families) and inferred the species phylogeny using the subset of 1,061 gene  
246 families containing one single sequence from each species. In agreement with previous reports  
247 [16,25], we found strong support for a division of the *aurelia* complex in two subclades  
248 (hereafter referred to as subclades A and B), separating *P. sonneborni* and *P. sexaurelia* from  
249 the other *aurelia* species (Fig 1). We then used this species phylogeny to identify gene  
250 duplications and speciation events in each of the 13,617 gene families, using the PHYLOG  
251 tree reconciliation method [26].

#### 252 **Fig 1. Dynamics of IES insertion/loss in *Paramecium*.**

253 The species phylogeny was reconstructed from a concatenated alignment of 1,061 single-copy  
254 genes. All internal branches are supported by 100% bootstrap values (except branch \*:  
255 bootstrap support = 83%). The age of IESs located within coding regions was inferred from the  
256 pattern of presence/absence within gene family alignments (N=13,617 gene families). Only  
257 IESs present within well-aligned regions were included in this analysis. The number of dated  
258 IESs and the fraction predicted to be old (predating the divergence between *P. caudatum* and  
259 the *P. aurelia* lineages), intermediate (before the radiation of the *P. aurelia* complex) or recent  
260 are reported for each species. Rates of IES gain (in red) and loss (in blue) were estimated along  
261 each branch using a Bayesian approach. Gain rates are expressed per kb per unit of time (using  
262 the branch length – in substitutions per site – as a proxy for time). Loss rates are expressed per  
263 IES per unit of time. NB: estimates of loss rate along terminal branches of the phylogeny also  
264 include false negatives (i.e. IESs that are present but that have not been detected), and hence  
265 may be overestimated.

266

267 In order to date events of IES gain or loss, it is necessary to identify IESs that are homologous,  
268 i.e. that result from a single ancestral insertion event. For this, we mapped the position of IES

269 excision sites in multiple alignments of each gene family (nucleic sequence alignments based  
 270 on protein alignments): IESs located at the exact same position within a codon were assumed  
 271 to be homologous (S6 Fig). To avoid ambiguities due to low quality alignments, we only  
 272 analyzed IESs present within well-conserved protein-coding regions (which represent from  
 273 45% to 51% of IESs located in coding regions; Fig 1). We then used the reconciled gene tree  
 274 to map events on the species phylogeny and estimate rates of IES gain and loss along each  
 275 branch of the species tree using a Bayesian approach accounting for IES losses and missing  
 276 data (see Materials and Methods). In the absence of fossil records, it is impossible to date  
 277 speciation events (in million years). We therefore used sequence divergence (number of amino-  
 278 acid substitutions per site) along branches of the phylogeny as a proxy for time.  
 279 Overall, 10.8% of IESs detected in *aurelia* species predate the divergence from *P. caudatum*  
 280 (referred to as ‘Old’ IESs in Fig 1), 79% were gained after the divergence of *P. caudatum*, but  
 281 before the radiation of the *aurelia* complex (‘Intermediate’ in Fig 1) and 10.2% are more recent.  
 282 The rate of IES gain varied widely over time: a burst of insertions occurred in the ancestral  
 283 branch leading to the *aurelia* clade, followed by a progressive slowdown in most lineages,  
 284 except in *P. sonneborni* where the rate of IES gain strongly increased again in the recent period  
 285 (18.8% of IESs detected in *P. sonneborni* are specific to that species). The IES gain rate has  
 286 remained substantial in *P. sexaurelia* and *P. tredecaurelia*, but has dropped to very low levels  
 287 in *P. tetraurelia/P. octaurelia* and in *P. pentaurelia/P. primaurelia* lineages, about 20 times  
 288 lower than in *P. sonneborni* or in the ancestral *aurelia* lineage (Fig 1). The rate of IES loss  
 289 appears to be more uniform along the phylogeny, with only 2 to 3-fold variation (Fig 1).  
 290

#### 291 Recent waves of mobilization of IESs

292 The episodic bursts of IES gains that we observed in the phylogeny are reminiscent of the  
 293 dynamics of invasion by TEs. To test the hypothesis that IESs might correspond to TEs, we  
 294 searched for evidence of mobile IESs, i.e. homologous IES sequences inserted at different (non-  
 295 homologous) loci. In a first step, we compared all IESs against each other with BLASTN to  
 296 identify clusters of homologous IESs. In a second step, all clusters with  $\geq 10$  copies were  
 297 manually inspected, to precisely delineate the boundaries of the repeated element and create a  
 298 multiple alignment of full-length copies. We then used these representative multiple alignments  
 299 to perform an exhaustive sequence similarity search based on HMM profiles over the entire IES  
 300 dataset (see Materials and Methods). Among the hits, we distinguished two categories: 1) cases  
 301 where the detected repeated element is located within the IES but does not include the  
 302 extremities of the IES, and 2) cases where the extremities of the repeated element correspond  
 303 precisely to the extremities of the IES. The first category probably corresponds to TEs that were  
 304 inserted within a pre-existing IES (i.e. nested repeats). The second category corresponds to  
 305 cases where the transposed element is the IES itself (i.e. mobile IESs). Overall, we detected 24  
 306 families with at least 10 copies of mobile IESs, totaling 7,443 copies of mobile IESs (Table 2).  
 307  
 308

| Repeat family | Length bp | Number of repeat-containing IESs |       |          |           |                |             | Number of mobile IESs per species |     |      |     |     |     |     |     |     |
|---------------|-----------|----------------------------------|-------|----------|-----------|----------------|-------------|-----------------------------------|-----|------|-----|-----|-----|-----|-----|-----|
|               |           | Total                            | % CDS | % Intron | % Interg. | Nested repeats | Mobile IESs | pca                               | pse | psa  | ptr | ppe | ppr | pbi | poc | pte |
| FAM_2183      | 233       | 5221                             | 68.9% | 7.6%     | 23.4%     | 1068           | 4153        | 0                                 | 4   | 3252 | 897 | 0   | 0   | 0   | 0   | 0   |
| FAM_3         | 290       | 2658                             | 67.6% | 8.8%     | 23.6%     | 875            | 1783        | 0                                 | 0   | 0    | 15  | 344 | 321 | 766 | 146 | 191 |
| FAM_2938      | 765       | 1548                             | 68.6% | 8.9%     | 22.5%     | 1170           | 378         | 0                                 | 7   | 370  | 1   | 0   | 0   | 0   | 0   | 0   |
| FAM_2317      | 768       | 559                              | 54.2% | 5.4%     | 40.4%     | 228            | 331         | 0                                 | 82  | 140  | 109 | 0   | 0   | 0   | 0   | 0   |
| FAM_2942      | 211       | 163                              | 62.6% | 6.7%     | 30.7%     | 53             | 110         | 0                                 | 0   | 110  | 0   | 0   | 0   | 0   | 0   | 0   |
| FAM_2334      | 214       | 124                              | 76.6% | 7.3%     | 16.1%     | 18             | 106         | 0                                 | 17  | 89   | 0   | 0   | 0   | 0   | 0   | 0   |

|                                 |      |       |        |       |        |      |      |    |     |      |      |     |     |     |     |     |
|---------------------------------|------|-------|--------|-------|--------|------|------|----|-----|------|------|-----|-----|-----|-----|-----|
| FAM_2321                        | 471  | 200   | 55.0%  | 3.5%  | 41.5%  | 116  | 84   | 1  | 11  | 58   | 10   | 1   | 1   | 2   | 0   | 0   |
| FAM_78                          | 50   | 65    | 0.0%   | 0.0%  | 100.0% | 9    | 56   | 0  | 0   | 0    | 0    | 34  | 22  | 0   | 0   | 0   |
| FAM_1402<br>(TIR <i>Thon</i> )  | 693  | 109   | 36.7%  | 1.8%  | 61.5%  | 56   | 53   | 0  | 6   | 8    | 5    | 0   | 0   | 3   | 16  | 15  |
| FAM_1257<br>(TIR <i>Merou</i> ) | 522  | 109   | 34.9%  | 7.3%  | 57.8%  | 60   | 49   | 0  | 0   | 5    | 5    | 3   | 2   | 7   | 12  | 15  |
| FAM_670                         | 46   | 45    | 73.3%  | 0.0%  | 26.7%  | 1    | 44   | 0  | 0   | 9    | 1    | 2   | 5   | 2   | 24  | 1   |
| FAM_2649                        | 762  | 73    | 47.9%  | 9.6%  | 42.5%  | 33   | 40   | 0  | 0   | 16   | 24   | 0   | 0   | 0   | 0   | 0   |
| FAM_1473                        | 98   | 33    | 72.7%  | 3.0%  | 24.2%  | 0    | 33   | 0  | 0   | 4    | 7    | 1   | 0   | 5   | 10  | 6   |
| FAM_51                          | 231  | 75    | 57.3%  | 2.7%  | 40.0%  | 43   | 32   | 0  | 0   | 0    | 0    | 12  | 9   | 11  | 0   | 0   |
| FAM_692                         | 93   | 28    | 89.3%  | 3.6%  | 7.1%   | 2    | 26   | 0  | 0   | 4    | 13   | 5   | 4   | 0   | 0   | 0   |
| FAM_1294<br>( <i>Baudroie</i> ) | 1706 | 72    | 51.4%  | 4.2%  | 44.4%  | 46   | 26   | 0  | 0   | 0    | 0    | 1   | 2   | 18  | 4   | 1   |
| FAM_2314<br>(DDE)               | 3421 | 480   | 56.9%  | 5.8%  | 37.3%  | 456  | 24   | 0  | 20  | 2    | 2    | 0   | 0   | 0   | 0   | 0   |
| FAM_2802                        | 32   | 23    | 100.0% | 0.0%  | 0.0%   | 1    | 22   | 0  | 0   | 2    | 20   | 0   | 0   | 0   | 0   | 0   |
| FAM_3194                        | 230  | 26    | 80.8%  | 0.0%  | 19.2%  | 6    | 20   | 20 | 0   | 0    | 0    | 0   | 0   | 0   | 0   | 0   |
| FAM_837                         | 50   | 18    | 72.2%  | 5.6%  | 22.2%  | 0    | 18   | 0  | 0   | 0    | 0    | 14  | 4   | 0   | 0   | 0   |
| FAM_1165                        | 77   | 16    | 87.5%  | 0.0%  | 12.5%  | 1    | 15   | 0  | 0   | 0    | 0    | 1   | 1   | 0   | 12  | 1   |
| FAM_2936                        | 223  | 40    | 72.5%  | 10.0% | 17.5%  | 25   | 15   | 0  | 0   | 15   | 0    | 0   | 0   | 0   | 0   | 0   |
| FAM_1259                        | 231  | 28    | 64.3%  | 0.0%  | 35.7%  | 14   | 14   | 0  | 0   | 0    | 0    | 1   | 0   | 13  | 0   | 0   |
| FAM_3023                        | 350  | 64    | 46.9%  | 3.1%  | 50.0%  | 53   | 11   | 0  | 0   | 11   | 0    | 0   | 0   | 0   | 0   | 0   |
| Total                           |      | 11777 |        |       |        | 4334 | 7443 | 21 | 147 | 4095 | 1109 | 419 | 371 | 827 | 224 | 230 |

309 **Table 2. Genomic and taxonomic distribution of mobile IESs.**

310 Detected repeats are divided in two categories: nested repeats (i.e. copies inserted within an IES, but not  
 311 including the extremities of the IES) and mobile IESs (copies whose extremities correspond to the  
 312 extremities of the IES). This table lists all families for which at least one species contains  $\geq 10$  copies  
 313 of mobile IESs in its genome. Species codes: pso: *P. sonneborni*, ptr: *P. tredecaurelia*, pte: *P.*  
 314 *tetraurelia*, pbi: *P. biaurelia*, poc: *P. octaurelia*, pse: *P. sexaurelia*, ppr: *P. primaurelia*, ppe: *P.*  
 315 *pentaurelia*, pca: *P. caudatum*.

316  
 317  
 318 Four of these mobile IESs present homology with DNA transposons of the ITm superfamily  
 319 previously identified in *P. tetraurelia* [4,5] (Table 2). FAM\_2314 (3.4 kb) includes an intact  
 320 open reading frame (ORF) encoding a DDE transposase. FAM\_1294 (1.7 kb) is homologous  
 321 to *Baudroie*, a composite Tc1-mariner element, and includes an ORF with similarity to tyrosine-  
 322 type recombinases. FAM\_1402 (0.7 kb) and FAM\_1257 (0.5 kb) correspond to non-  
 323 autonomous elements, homologous to the terminal inverted repeats (TIR) of *Thon* and *Merou*  
 324 respectively. The other families of mobile IESs do not match with any known TEs. Their  
 325 relatively short lengths (32 bp to 765 bp) and the absence of homology with any known protein,  
 326 indicate that they most probably correspond to non-autonomous elements, mobilized by  
 327 transposases expressed from active TEs.

328 The genomic distribution of mobile IESs within MAC-destined regions is similar to that of  
 329 other IESs: most of the families are predominantly located within protein-coding regions  
 330 (which represent  $\sim 70\%$  of the MAC genome) (Table 2). The only notable exceptions are  
 331 FAM\_1257, FAM\_1402 and FAM\_78 elements, which are under-represented within genes  
 332 (Table 2). In particular, FAM\_78 elements are exclusively found in intergenic regions.

333



334 As explained previously, it is possible to date insertions for the subset of IESs located within  
335 well-conserved protein-coding regions. The vast majority (97.5%) of mobile IES copies that  
336 can be dated correspond to recent insertions (as compared to only 9.5% of recent insertions for  
337 the other IESs). FAM\_3 is present in all genomes of the subclade A (Table 2), and 94% of dated  
338 insertions are shared by at least two species, which indicates that this element has been very  
339 active at the beginning of the radiation of this clade. For the other families of mobile IESs, more  
340 than 97% of insertion loci are species-specific. Thus, all the families of mobile IESs that we  
341 detected have been subject to recent waves of insertion. This most probably reflects the fact  
342 that more ancient families are difficult to recognize, because of the rapid divergence of IES  
343 sequences.

344  
345 The largest family (FAM\_2183) corresponds to a 233 bp-long non-autonomous element, for  
346 which we detected a total of 3,252 copies of mobile IESs in the genome of *P. sonneborni*, and  
347 897 in *P. tredecaurelia* (Table 2, Fig 2). Among the 1,973 copies inserted in well-conserved  
348 coding regions, only two are shared by the two species. This indicates that this element has been  
349 highly active, independently in the *P. sonneborni* and the *P. tredecaurelia* lineages. The very  
350 low number of shared copies suggests that these two copies correspond to independent insertion  
351 events at a same site, rather than ancestral events. It is important to note that *P. sonneborni* and  
352 *P. tredecaurelia* belong to two distantly related subclades of the *aurelia* complex (Fig 1). The  
353 high level of sequence similarity between copies (average pairwise identity=72%; Fig 2) and  
354 the absence of copies in other *Paramecium* species (except 4 copies in *P. sexaurelia*), indicate  
355 that both *P. sonneborni* and *P. tredecaurelia* have been invaded recently by this mobile element.  
356 Interestingly, there are four other families (FAM\_2317, FAM\_2321, FAM\_2649, FAM\_2802)  
357 that are shared by *P. tredecaurelia* and the *P. sonneborni/P. sexaurelia* clade, which implies  
358 that multiple families of mobile IESs have been horizontally transferred between those lineages.

359  
360 **Fig 2. Phylogenetic analysis of the largest family of mobile IESs.**

361 (A) Sequence logo [27], based on the alignment of the entire FAM\_2183 family (N=4,153  
362 mobile IESs). All copies present a high level of sequence similarity (average pair-wise  
363 identity 72%) throughout their entire length (233 bp), not just at their ends. (B) Phylogenetic  
364 tree of a subset of sequences (200 IESs from *P. tredecaurelia* in black, and 200 from *P.*  
365 *sonneborni* in red), randomly sampled from the entire FAM\_2183 alignment (computed with  
366 PhyML [28]). The tree topology is mainly star-like, which indicates that most copies derive  
367 from several bursts of insertions.

368  
369

370 **IES excision mechanism varies with IES age**

371 Like any biological process, the excision of IESs during new MAC development is not 100%  
372 efficient [4,29]. For instance, the IES retention rate in *P. tetraurelia* MAC chromosomes is on  
373 average 0.8% in wild-type cells [30]. We observed that a substantial fraction of IESs have a  
374 much lower excision efficiency. In all *Paramecium* species, the proportion of ‘weak’ IESs  
375 (defined as IESs with more than 10% retention in wild-type cells) differs strongly among  
376 genomic compartments: from 0.7% on average for IESs located within genes (introns or exons),  
377 to 5.4% for IESs in intergenic regions (S7A Fig). This difference probably results from the fact  
378 that IESs with low excision efficiency are more deleterious, and therefore more strongly  
379 counter-selected, in genes than in intergenic regions. Interestingly, we also observed that within  
380 coding regions, the proportion of weak IESs is much higher for newly gained IESs (2.1% on  
381 average) than older ones (0.3%) (S7B Fig). This indicates that after their insertion, IESs  
382 progressively accumulate changes that make them more efficiently excised, presumably in  
383 response to the selective pressure against retention of IESs within coding regions.

384 In *P. tetraurelia*, functional analyses have revealed that different classes of IESs rely on  
385 different excision pathways [30–32]. A large subset of IESs (63%) require the histone H3  
386 methyltransferase Ezl1 for their excision, while a much smaller subset (7%) requires both the  
387 Ezl1 and the Dcl2/3 proteins, which are necessary for the biogenesis of 25 nt long scnRNAs  
388 [30,33]. The remaining 30% of IESs require neither Ezl1 nor Dcl2/3 to complete excision.  
389 Using published IES excision efficiency datasets upon silencing of *EZL1* and *DCL2/3* [30], we  
390 found that 92% of newly inserted *P. tetraurelia* IESs are sensitive to Ezl1, as compared to 39%  
391 for old ones (Fig 3). Similarly, the proportion of Dcl2/3-dependent IESs varies from 17% for  
392 new IESs to 3% for old ones. These observations suggest that newly inserted IESs, like TEs  
393 themselves [34], initially depend on histone marks deposited by Ezl1 (and to some extent on  
394 the scanRNA pathway). Over time, histone marks and scnRNAs become dispensable as IESs  
395 gradually acquire features that allow them to be efficiently excised.  
396

397 **Fig 3. Older IESs are less dependent on Ezl1 and Dcl2/Dcl3 for their excision.**

398 Barplots represent the fraction of *P. tetraurelia* IESs with a high retention score (IRS > 10%)  
399 after silencing of *EZL1* or *DCL2/DCL3*, according to their age. The age of an IES insertion is  
400 defined by the phylogenetic position of the last common ancestor (LCA) of species sharing an  
401 IES at the same site (New: *P. tetraurelia*-specific IES; Node *n*: the LCA corresponds to node  
402 number *n* in the species phylogeny; Old: the LCA predates the *P. aurelia*/*P. caudatum*  
403 divergence).

404  
405 We also compared the length of IESs according to their age. IESs have a characteristic length  
406 distribution, which shows the same ~10 bp periodicity in all *aurelia* species (Fig 4A), likely  
407 reflecting structural constraints on the excision process [4,7]. We observed that the length  
408 distribution of IESs changes drastically over evolutionary time. For instance, in *P. sonneborni*,  
409 *P. tredecaurelia* and *P. tetraurelia*, the proportion of IESs in the first peak of the length  
410 distribution (< 35 bp) ranges from 1-10% for new IESs to 81-84% for old ones (Fig 4B), and  
411 similar patterns are observed in all other *aurelia* species (S8 Fig). In *P. caudatum*, the overall  
412 length distribution is shifted towards shorter IESs (71% in the first peak, compared to 35% in  
413 *aurelia*; Fig 4A). This suggests that this lineage has not been subject to IES insertion waves for  
414 a long period of time, in agreement with the paucity of recognizable mobile IESs in that genome  
415 (Table 2).  
416

417 **Fig 4. Length distribution of IESs according to their age.**

418 (A) Comparison of the length distribution of IESs in *P. caudatum* (N=8,172 IESs) and in species  
419 from the *aurelia* clade (N=392,082 IESs). The fraction of IESs present within each peak of the  
420 distribution is indicated for the first 10 peaks. (B) Comparison of the length distribution of IESs  
421 according to their age (for the subset of datable IESs located in coding regions). The age of IES  
422 insertions is defined as in Fig 3. Results from other species are presented in S8 Fig.  
423

424 **Genomic distribution of IESs according to their age**

425 Because of the rapid divergence of non-coding sequences, it is generally not possible to assess  
426 homology among IES insertion sites located in intergenic regions, and hence it is not possible  
427 to date them directly. We therefore used the length of IESs as a rough proxy for their age, to  
428 investigate their genomic distribution over time. We observed that in all *aurelia* species, long  
429 IESs (> 100 bp, presumably young) are uniformly distributed across genomic compartments  
430 (introns, coding regions and intergenic regions) (S9 Fig). Conversely, short IESs (<35 bp,  
431 presumably older) are enriched in coding regions (on average, 81% of short IESs in coding  
432 regions, vs. 70% expected; S9 Fig). This suggests that IESs located within intergenic regions  
433 have a shorter lifespan than those located in coding regions.

434

435 Exaptation of the IES excision machinery

436 A large majority of detected IESs predate the divergence of the *aurelia* clade (Fig 1). Because  
437 of the rapid evolution of non-coding sequences, orthologous IESs from different species are  
438 generally too divergent to be recognized by sequence similarity search. Yet the comparison of  
439 all sequences against each other revealed several interesting exceptions. Overall, we identified  
440 69 families of homologous IESs conserved across at least 5 of the 8 species of the *aurelia* clade.  
441 These highly conserved IESs are similar to other IESs in terms of length (mean=75 bp) or  
442 genomic distribution (79% within protein-coding genes, 21% in intergenic regions). Their high  
443 levels of sequence conservation indicate that they are subject to strong selective constraints,  
444 and hence that they have a function, beneficial for *Paramecium*. By definition, IESs are absent  
445 from the MAC genome so they cannot be expressed in vegetative cells. However, they can  
446 potentially be transcribed during the early development of the new MAC, before IES excision  
447 occurs [31,35]. To gain insight into their possible functions, we analyzed the transcription of  
448 conserved IESs using polyadenylated RNAseq data from autogamy time course experiments in  
449 *P. tetraurelia* [36]. Among the 56 families of highly conserved IESs present in *P. tetraurelia*,  
450 10 (18%) are transcribed at substantial levels (>1 RPKM) during autogamy (as compared to  
451 0.8% for other IESs) (S4 Table). One of these IESs (~800 bp-long) contains a gene encoding a  
452 putative DNA-binding protein, well conserved in all species of the *aurelia* clade and expressed  
453 at high levels during the early stages of autogamy (Fig 5).

454

455 **Fig 5. A highly conserved IES contains a gene encoding a putative DNA-binding protein.**

456 (A) Phylogenetic tree of the IES family FAM\_4968. This IES is highly conserved in all species  
457 of the *aurelia* clade ( $\geq 75\%$  nucleotide identity between the most distantly related species).  
458 BioNJ tree for 211 sites, Poisson model, 100 replicates. (B) Multiple alignment of the protein  
459 encoded by this IES. The coding region is subject to strong purifying selection ( $dN/dS=0.14$ ).  
460 The encoded protein contains a helix-turn-helix DNA-binding domain (PF03221, IPR006600).  
461 (C) Gene annotation and expression level during autogamy of *P. tetraurelia*. The IES is located  
462 within a gene (on the opposite strand). The gene within the IES is expressed at high levels  
463 during the early stages of autogamy (T0 and T5).

464

465 All other highly conserved IESs are much shorter (< 300 bp), most probably too short to encode  
466 proteins. But we found examples suggesting that some of them contribute to the regulation of  
467 the expression of their host gene. For instance, we identified a conserved IES located at the 5'  
468 end of a gene of unknown function, encompassing the transcription start site and the beginning  
469 of the first exon (including the 5'UTR and the first codons). The excision of the IES during  
470 MAC development leads to the loss of the initiation codon and of the promoter region, and  
471 thereby to the silencing of this gene in vegetative cells (S10 Fig). These examples illustrate that  
472 the IES excision machinery has been recruited during evolution to contribute new functions  
473 beneficial for *Paramecium*.

474

## 475 Discussion

476

477 A majority of *Paramecium* IES insertions result from the transposition of mobile IESs

478 To explore the evolutionary origin of IESs, we analyzed the MIC genomes of eight species of  
479 the *P. aurelia* complex, and of an outgroup species, *P. caudatum*. Unexpectedly, we discovered  
480 that the MIC genomes of *P. caudatum* strains are at least one order of magnitude larger than  
481 those of *P. aurelia* species (~1,600 to 5,500 Mb vs ~110-160 Mb). The sequencing of *P.*  
482 *caudatum* My43c3d revealed that its huge MIC genome size is caused by the amplification of

483 two major satellite repeats, which represent 71% of its MIC-limited genome (S4 Fig). The high  
484 variability of genome sizes across the *P. caudatum* lineage makes this clade an attractive model  
485 system to study the possible phenotypic consequences of genome size variations within a  
486 species.

487  
488 All the *Paramecium* MIC genomes we sequenced present a high density of IESs in MAC-  
489 destined sequences: from 0.5 IES per kb in *P. caudatum* up to 1 IES per kb in *P. sonneborni*  
490 (Table 1). The vast majority of these IESs (83% on average) are located within genes, as  
491 expected given the very high gene density in MAC genomes (S3 Table). In *aurelia* species,  
492 there are on average 0.95 IESs per protein-coding gene. The IES density varies among genes,  
493 but overall, ~50% of the ~40,000 genes contain at least one IES. Moreover, the analysis of  
494 MIC-specific regions that are occasionally retained in the MAC (MAC-variable regions)  
495 revealed similar IES densities (S2 Table), which suggests that, in addition to IESs located in  
496 MAC-destined regions, many other IESs are located within MIC-specific regions.

497  
498 To explore the origin and evolution of these tens of thousands of IESs, we sought to identify  
499 homologous IESs across the 9 *Paramecium* species. Given their rapid rate of evolution,  
500 homologous IESs are generally too divergent to be recognized by sequence similarity at this  
501 evolutionary scale. However, it is possible to identify homologous IESs based on their shared  
502 position within multiple alignments of homologous genes. Thus, for the subset of IESs located  
503 in coding regions, we were able to infer rates of IES gain and loss across the species phylogeny  
504 (Fig 1). Overall, about 90% of IESs detected in *aurelia* species predate the radiation of that  
505 clade, but fewer than 10% are shared with *P. caudatum*. Thus, the vast majority of *aurelia* IESs  
506 result from a major wave of IES gains that occurred after the divergence of *P. caudatum*, but  
507 before the radiation of the *aurelia* complex. Similarly, 80% of IESs detected in *P. caudatum*  
508 are specific to that lineage, which implies that multiple independent events of massive IES  
509 invasions occurred during evolution.

510  
511 The burst of IES gains at the base of the *aurelia* clade was followed by a progressive slowdown  
512 in most species, except in the *P. sonneborni* lineage, which has been subject to a second wave  
513 of IES insertions (Fig 1). Interestingly, the comparison of IES sequences revealed that  
514 thousands of these insertions result from the recent and massive mobilization of a small number  
515 of IESs. Several families of mobile IESs present homology with known ITm transposons, and  
516 some of them encode transposases. But most mobile IESs do not appear to have any protein-  
517 coding potential, and therefore must correspond to non-autonomous elements, whose mobility  
518 depends on the expression of active transposons. The number of detected mobile IES copies  
519 varies widely across species (Table 2). For instance, mobile IESs have been very active in the  
520 *P. sonneborni* lineage (4,095 copies), much more than in its sister lineage, *P. sexaurelia* (147  
521 copies). Thus, mobile IESs account for at least 20% of the difference in IES number between  
522 these two species (Fig 1).

523  
524 Most IESs found in present-day genomes correspond to unique sequences (S11 Fig). After a  
525 burst of transposition, the different copies inserted in the genome are expected to diverge  
526 rapidly, like any neutrally evolving sequence. Typically, the average synonymous divergence  
527 (measured in orthologous protein-coding genes) between *P. sonneborni* and *P. sexaurelia* is  
528 around 0.8 substitutions/site. Thus, in the absence of selective pressure, mobile IES copies that  
529 predate this speciation event (and *a fortiori* those that predate the radiation of the *aurelia*  
530 complex) are expected to be far too diverged to be recognizable. As a result, mobile IESs that  
531 can be detected probably represent only the tip of the iceberg. Overall, we found a strong  
532 correlation ( $R^2=0.86$ ,  $p=8 \times 10^{-4}$ ) between the number of mobile IES copies detected in each

533 species (Table 2) and the rate of IES gain along corresponding branches of the phylogeny (Fig  
534 1), which suggests that most gains result from transposition.

535  
536 Interestingly, the five most active families in *P. tredecaurelia* all show the signature of  
537 horizontal transfer with the distantly related *P. sonneborni* lineage (Table 2). This is notably  
538 the case of the largest family that we identified (FAM\_2183: 3,252 and 897 copies in each  
539 species, respectively; Fig 2). This pattern is reminiscent of the typical life-cycle of many DNA  
540 transposons: when a new element enters a genome, it is initially very active and produces a  
541 wave of insertions. Its activity then progressively slows down, largely because defense  
542 mechanisms become more efficient in the host genome. In the long-term, DNA transposons  
543 escape extinction only if they can occasionally be transmitted to a new host [37]. Thus, the  
544 variation of IES insertion rates that we observed in the *Paramecium* phylogeny fits very well  
545 with the dynamics of TEs: rare episodes of massive invasions (promoted by horizontal transfer  
546 to a new host), followed by progressive slowdown of transposition activity.

547  
548 TEs are not the unique source of IES gains. Mutations in MAC-destined regions can generate  
549 sequence motifs that are recognized by the IES excision machinery, and thereby create new  
550 IESs. There is indeed evidence that cryptic IES signals occasionally trigger the excision of  
551 MAC-destined sequences [4,29], and that some IESs originated from MAC-destined sequences  
552 [12,13]. However, our results suggest that the vast majority of IESs correspond to  
553 unrecognizable fossils of mobile elements – as initially proposed by Klobutcher and Herrick  
554 [10,11].

555  
556 *The fitness consequences of IES invasions*  
557 In all *Paramecium* species, we observed a deficit of IESs in highly expressed genes (S5 Fig).  
558 As previously reported in *P. tetraurelia* [4], this pattern most probably reflects selective  
559 pressure against IES insertions within genes. Indeed, the IES excision machinery (like any other  
560 biological machinery) is not 100% efficient: a small fraction of IES copies are retained in the  
561 MAC or subject to imprecise excision [29]. Typically, the average IES retention rate in MAC  
562 chromosomes is 0.8% in *P. tetraurelia* [30]. For IESs located within genes, such excision errors  
563 are expected to have deleterious consequences on fitness, in particular for genes that have to be  
564 expressed at high levels [4]. And indeed, in agreement with this hypothesis of selective pressure  
565 against IESs within genes, we observed that the proportion of ‘weak’ IESs (i.e. IESs with a  
566 relatively high retention frequency) is much lower in genes than in intergenic regions (S7A  
567 Fig).

568 Despite their selective cost, weakly deleterious IES insertions can eventually become fixed by  
569 random genetic drift. Once fixed, the fitness of the organism will depend on its ability to  
570 properly excise the IES during MAC development. Over time, selection should favor the  
571 accumulation of substitutions that increase the efficiency of IES excision. Indeed, we did  
572 observe that the proportion of weak IESs decreases with their age (S7B Fig). Interestingly, older  
573 IESs, which are also shorter, are less dependent on the Ezi1 and Dcl2/3 proteins (Fig 3). This  
574 suggests that after their insertion, IESs progressively acquire features that make them more  
575 efficiently excised, by a pathway that requires neither scanRNAs nor histone marks [30].

576  
577 Although most IESs appear to behave as selfish genetic elements, this does not exclude that  
578 occasionally, some IESs might confer a benefit for their host. While most IESs diverge very  
579 rapidly (as expected for neutrally evolving sequences), we identified 69 families of homologous  
580 IESs that have remained strongly conserved across the *aurelia* clade. Their high level of  
581 conservation indicates that they are subject to strong purifying selection. This implies that these  
582 IESs fulfill a function that contributes to the fitness of *Paramecium*. Notably, we identified one

583 IES that contains a protein-coding gene (Fig 5). This gene is expressed during the early stages  
584 of autogamy, likely from the new developing MAC, before IES excision (Fig 5). Interestingly,  
585 18% of the conserved IESs are transcribed during autogamy (as compared to 0.8% for other  
586 IESs). Most conserved IESs are too short to encode proteins, but they may contribute to gene  
587 regulation (e.g. S10 Fig). Given the enrichment of conserved IESs in genes expressed during  
588 early autogamy, it is tempting to speculate that these IESs may play a role in controlling the  
589 IES excision machinery itself. Indeed, this machinery must be tightly regulated to ensure that  
590 all IESs are efficiently excised, while limiting off-target excision of MAC-destined regions,  
591 which occurs occasionally in MAC chromosomes [4,29]. Thus, developmental disruption of  
592 genes encoding IES excision factors by the excision machinery may provide a simple regulatory  
593 feedback loop to decrease the activity of the IES excision machinery as soon as a large fraction  
594 of IESs have been excised: if a given IES drives the expression of a protein factor that is  
595 essential for IES excision, then this process is progressively interrupted by the removal of this  
596 IES during MAC development. More generally, such IESs may provide an exquisite  
597 developmental process to regulate DNA elimination events and /or MAC differentiation.  
598

599 [Why are IESs not eliminated from the germline genome?](#)

600 Overall, ~50% of *Paramecium* genes contain at least one IES. Because of excision errors, this  
601 high prevalence of IESs within genes must represent a substantial burden. This raises the  
602 question of why IESs do not get eliminated from the MIC genome.

603 In all species, we observed that the length of IESs is negatively correlated with their age (Fig  
604 4, S8 Fig). This pattern is similar to that observed in other eukaryotes, where fixed copies of  
605 TEs tend to shrink over time and finally disappear, due to the accumulation of small deletions  
606 [38]. IESs located in non-coding regions can be lost by several processes. First, mutations  
607 within excision signals (e.g. in the TA dinucleotides) can transform an IES into a MAC-destined  
608 sequence. Second, deletions can lead to the loss of an IES – either progressively by successive  
609 small deletions or by a single larger deletion encompassing the IES. However, for an IES  
610 located within an exon, most deletions affecting the coding-region, and any mutation within the  
611 IES preventing its proper excision during MAC development, would be strongly counter-  
612 selected. Thus, exonic IES losses can only occur by precise complete deletions that leave the  
613 open reading frame intact. We did observe such cases of precise loss (S6 Fig). One possible  
614 mechanism is that the IES excision machinery, which is normally at work during MAC  
615 development, might occasionally operate within the MIC. An alternative hypothesis is that IESs  
616 might be lost from the MIC by gene conversion, through homologous recombination with  
617 MAC-derived DNA fragments. Interestingly, this scenario might explain cases where we  
618 observed concomitant losses of neighboring IESs (see e.g. IES 5 and 6 in S6 Fig). Further  
619 studies will be needed to determine the mechanisms underlying precise IES loss. With regard  
620 to the evolution of the number of IESs, the important point is that the rate of IES loss has  
621 remained quite stable and relatively low across the phylogeny (Fig 1). Conversely, the rate of  
622 IES gains has been much more erratic, characterized by episodic waves of insertions, during  
623 which the IES gain rate largely exceeded the loss rate (Fig 1). In the end, the number of IESs  
624 reflects the balance between gain and loss rates. Thus, the large number of IESs in *Paramecium*  
625 can simply be explained by massive invasions of mobile IESs, followed by periods of lower  
626 activity, during which IES copies progressively diverge, and occasionally get lost by deletion  
627 from the MIC.  
628

629 [Parallel scenario for the evolution of IESs and spliceosomal introns](#)

630 In most organisms, gene regulatory elements and coding regions constitute a no man's land for  
631 TEs, because insertions that disrupt gene function are strongly counter-selected. But in some  
632 ciliates, it is possible for mobile elements to proliferate within genes in the MIC genome, as

633 long as they are efficiently and precisely excised during the development of the MAC genome,  
634 before genes start to be expressed. DNA transposons encode transposases that allow their  
635 mobilization by a ‘cut-and-paste’ process. Generally, the excision step leaves a few nucleotides  
636 at the original insertion site, but one peculiarity of PiggyBac transposases is that they can excise  
637 copies precisely, without leaving any scar [39]. This feature may have predisposed PiggyBac  
638 to extend its niche to genic regions in ciliates. We speculate that the very first proto-IESs  
639 corresponded to PiggyBac elements that had evolved a specific transposase with a ‘cut and  
640 close’ activity targeted to the developing MAC. As soon as several copies of these proto-IESs  
641 have been fixed within genes, then the host organism has become dependent on the activity of  
642 the PiggyBac transposase to ensure that all these copies are precisely excised from its MAC.  
643 This selective pressure would have driven the domestication of the PiggyBac transposase by its  
644 host, and then, progressively, the evolution of the other components that contribute to the  
645 efficient excision of proto-IESs. Once the IES excision machinery is in place in the ancestral  
646 *Paramecium* lineage, other families of TEs (including non-autonomous elements) could hijack  
647 the machinery and in turn exploit this intragenic niche, eventually creating the tens of thousands  
648 of IESs found in present-day *Paramecium* genes. The first steps of this scenario remain  
649 speculative, since there are no recognizable traces of PiggyBac-related IESs in present-day  
650 genomes. But, the discovery of thousands of mobile IESs directly demonstrates the major  
651 contribution of TEs to the expansion of the IES repertoire.  
652

653 This scenario is in many points similar to the one proposed for the evolution of spliceosomal  
654 introns. Indeed, it had long been postulated, based on similarities in biochemical processes, that  
655 spliceosomal introns derive from mobile elements (group II self-splicing introns) [40]. In  
656 eukaryotes, the spread of introns in protein-coding genes has been facilitated by the fact that  
657 transcription and translation occur in separate compartments, thus offering the opportunity for  
658 these mobile elements to be excised from the mRNA in the nucleus without interfering with its  
659 translation in the cytoplasm [40] – like IESs, which are excised from genes before they get  
660 expressed in the MAC. Once the first introns were established, selection drove the emergence  
661 of host factors contributing to the efficiency of the splicing process, which progressively led to  
662 the evolution of the modern spliceosome - a complex ribonucleoprotein machinery composed  
663 of more than 200 proteins and five small RNAs [41]. In turn, the existence of the spliceosome  
664 released the requirement for introns to maintain their self-splicing activity [42], and allowed  
665 other TEs to hijack this machinery. The recent discovery of non-autonomous DNA transposons  
666 that generated thousands of introns in genomes of some algae directly demonstrated that mobile  
667 elements are a major source of new introns [43]. During evolution, the spliceosome has been  
668 exapted to fulfill functions useful for the host, notably via the process of alternative splicing,  
669 which contributed to diversification of the protein repertoire [44]. Alternative splicing has also  
670 been recruited as a means to regulate gene expression [45]. In particular, this is the case of many  
671 genes that encode splicing factors, which contain highly conserved introns, allowing them to  
672 control the homeostasis of the spliceosome via auto-regulatory loops [46,47]. This pattern is  
673 reminiscent of highly conserved IESs that we uncovered in *Paramecium* lineages, which appear  
674 to be particularly enriched within genes that are expressed during early MAC development. But  
675 although it is clear that some introns have a function, it should not be forgotten that, like IESs,  
676 introns also represent a burden for their host, because of errors of the splicing machinery [48–  
677 52].  
678

679 The coexistence of MAC and MIC is a common feature of all ciliates, yet they do not all contain  
680 such a high density of IESs in coding regions. Notably, there are ~12,000 IESs in the germline  
681 genome of *Tetrahymena thermophila* (~0.1 IES per kb of MAC-destined sequence), but only  
682 11 of them are located within coding regions [53]. These exonic IESs differ from other IESs by

683 their strongly conserved terminal inverted repeats ending with 5'-TTAA-3', the target site of  
684 piggyBac transposons. They are excised precisely (restoring a single TTAA) by two  
685 domesticated piggyBac transposases, Tpb1 and Tpb6, which may thus have retained the  
686 cleavage specificity of their transposon ancestor [54,55]. We analyzed these 11 exonic IESs: 8  
687 of them are inserted in protein-coding regions that are not conserved in *Paramecium*, and the  
688 other 3 are inserted at sites that do not contain IESs in *Paramecium*. There is therefore no  
689 evidence for shared exonic IESs between *T. thermophila* and *Paramecium*. The vast majority  
690 of the ~12,000 *T. thermophila* IESs are excised by another domesticated piggyBac transposase,  
691 Tpb2 [56]. Although Tpb2 retains the cleavage geometry of piggyBac transposases, producing  
692 staggered double-strand breaks with 4-nt 5' overhangs [56], it has lost almost all sequence  
693 specificity and is thought to be recruited at IES ends by chromatin marks [57]. As a result,  
694 several possible cleavage sites are usually present at IES ends and the rejoining of flanking  
695 sequences generates microheterogeneity in the MAC sequence [53], which explains why Tpb2-  
696 dependent IESs are restricted to introns and intergenic regions [53]. It is important to note that  
697 Tpb2 is an essential gene in *T. thermophila* [56], suggesting that genome-wide retention of IESs  
698 in the MAC is still highly detrimental. Interestingly, phylogenetic analyses indicate that the  
699 *Paramecium* endonuclease PiggyMac (Pgm) and Tpb2 are more closely related to each other  
700 than to Tpb1 or Tpb6, and may even be orthologs [7]. In the case of Pgm, however, sequence  
701 specificity was relaxed only for the two distal positions of the 4-nt cleavage sites, and the central  
702 TAs remain a strict requirement for IES excision in *Paramecium*. Although piggyBac  
703 transposons are completely absent from the present-day *Paramecium* germline, this  
704 evolutionary solution may have been favored because it also allowed for precise excision of  
705 Tc1/mariner insertions, which in turn would have allowed continuous accumulation of  
706 insertions within exons [4].

707  
708 Importantly, the fact that a mechanism of precise excision exists in *T. thermophila* (via Tpb1  
709 and Tpb6) raises the question of why intragenic IESs are not more abundant in its genome. A  
710 similar question arises from the distribution of introns in eukaryotes: why are introns very  
711 abundant in some lineages but rare in others (e.g. ~7 introns per gene in vertebrates vs ~0.04 in  
712 hemiascomycetous yeast)? Part of the explanation may reside in the fact that, because of  
713 population genetic forces, some lineages are more subject to random genetic drift than others,  
714 and therefore are more permissive to invasion by weakly deleterious genetic elements [51,52].  
715 And it is also possible that the abundance of intragenomic parasites is strongly affected by  
716 contingency – rare events of massive invasion, followed by long periods during which copies  
717 are lost at a slow rate.

718  
719 In conclusion, the evolution of the nuclear envelope opened the way for introns to invade genes  
720 in eukaryotes, and likewise, the separation of somatic and germline functions between the MIC  
721 and the MAC offered the possibility for selfish genetic elements to invade genes in ciliates.  
722 Genetic conflicts between these selfish elements and their host genome resulted in the evolution  
723 of complex cellular machineries (the spliceosome, the IES excision machinery), which, in the  
724 short term, reduced excision errors, but in the long term facilitated their proliferation within  
725 genes. The paradigm of intragenomic parasites [58–60] provides a simple and powerful  
726 explanation for the “raison d’être” of these mysterious pieces of non-coding DNA that interrupt  
727 genes.

## 728 729 **Materials and Methods**

730 **Cells and cultivation**  
731 All experiments were carried out with the *Paramecium* strains listed in Table 1. *Paramecium*  
732 *aurelia* cells were grown in a wheat grass powder (WGP, Pines International, USA) infusion



733 medium bacterized the day before use with *Klebsiella pneumoniae* and supplemented with 0.8  
734 mg/L of  $\beta$ -sitosterol (Merck). Cultivation and autogamy were carried out at 27 °C. Monoclonal  
735 cultures of the *P. caudatum* cells were grown in a 0.25% Cerophyl infusion inoculated with  
736 *Enterobacter aerogenes* at 22°C [61].

737

#### 738 Micronucleus-enriched preparation

739 To purify the MICs from vegetative cells, we used the same strategy as the one previously  
740 published [5,20], with some optimization for the sorting steps. For *Paramecium aurelia*,  
741 transgenic cells expressing a micronuclear (MIC)-localized version of the Green Fluorescent  
742 Protein (GFP) were obtained by microinjection of the vegetative macronucleus with the *P.*  
743 *tetraurelia* CenH3a-GFP plasmid, described in [62]. In the transformed clones, GFP was  
744 exclusively found in the MICs and the transformed clones were selected for their GFP  
745 signal/noise ratio. Viability of the sexual progeny after autogamy of the transformed clones was  
746 systematically monitored to make sure that the presence of the transgene did not impair the  
747 functionality of the MICs. A MIC-enriched preparation was obtained from approximately 3 L  
748 of exponentially growing vegetative cells after fractionation and Percoll density gradient  
749 centrifugation as described in [5] and kept at -80°C until further use.

750 A slightly different procedure was used for *Paramecium caudatum* cells, which were not  
751 transformed with the CenH3a-GFP transgene. The MICs of *P. caudatum* strain My43c3d (used  
752 for genome sequencing) were purified with a protocol modified from [63]. Briefly, 3L of a  
753 starved culture (~600 cells/mL) were filtered through 8 layers of gauze and concentrated by  
754 centrifugation in pear-shaped centrifuge tubes. Packed cells were transferred to a 250 mL cell  
755 culture flask, resuspended in 150 mL sterile Eau de Volvic and incubated over night at 22°C.  
756 All subsequent steps were performed at 4°C or on ice. The overnight culture was again  
757 concentrated by centrifugation and the cell pellet was resuspended and washed in 0.25 M TSCM  
758 buffer (10 mM Tris-HCl, pH 6.8, 0.25 M sucrose, 3 mM CaCl<sub>2</sub>, 8mM MgCl<sub>2</sub>) [64]. After  
759 centrifugation for 3 min at 100 g, pelleted cells were resuspended and incubated for 5 min in  
760 10 mL 0.25M sucrose-lysis buffer (10 mM Tris-HCl, pH 6.8, 0.25 M sucrose, 3 mM CaCl<sub>2</sub>,  
761 1mM MgCl<sub>2</sub>, 0.1% Nonidet-P40, 0.1% Na-deoxycholate). The cell suspension was centrifuged  
762 for 2 min at 500 g and the packed cells were lysed in 1 mL of 0.25M sucrose-lysis buffer by  
763 about 10-20 strokes on a vortex machine. Lysed cells were washed in 14 mL of 0.25 M TSCM  
764 buffer and centrifuged for 1 min at 100 g. The supernatant (containing the MICs) was  
765 centrifuged for 10 min at 1,500 g and the pellet was resuspended in 8 mL of 60% Percoll. This  
766 suspension was centrifuged for 15 min at 24,000 g in a fixed-angle rotor and the micronuclei  
767 formed a diffuse band near the middle of the centrifuge tube. This MIC containing layer was  
768 carefully removed with a pipette in about 2 mL, diluted with 10 mL of 0.25 M TSCM buffer  
769 and pelleted by centrifugation for 10 min at 1,500 g. The MIC pellet was resuspended in 100  
770  $\mu$ L of 0.25 M TSCM buffer, carefully mixed with 50  $\mu$ L of 50% glycerol and kept at -80°C  
771 until further use.

772 The MICs of the other *P. caudatum* strains were purified with a similar protocol, but omitting  
773 the Percoll step and replacing it with centrifugation across a sucrose cushion. Lysed cells were  
774 resuspended in 9 mL of 0.25 M TSCM buffer and this suspension was carefully layered on top  
775 of a sucrose cushion consisting of 2 mL of 1.6 M TSCM buffer and 2 mL of 0.9 M TSCM  
776 buffer and centrifuged in a swinging bucket rotor for 10 min at 300 g with lowest acceleration  
777 and braking levels. Depending on the strain, the micronuclei accumulated at the bottom of the  
778 0.25 M or 0.9 M TSCM cushion and were removed by careful pipetting of the respective phases  
779 to new 15-mL tubes. MIC- containing suspensions were diluted with 0.25 M TSCM buffer,  
780 centrifuged for 10 min at 1,500 g and the MIC pellets were subsequently treated as described  
781 above.

782

### 783 Quantification of MIC DNA content by flow cytometry

784 MIC-enriched samples were thawed on ice, diluted 1/5 to 1/10 in washing buffer (0.25 M  
785 sucrose; 10 mM Tris pH 7.4; 5 mM MgCl<sub>2</sub>; 15 mM NaCl; 60 mM KCl; 0.5 mM EGTA) and  
786 stained on ice with propidium iodide at 100 µg/mL final concentration. We used Tomato nuclei  
787 obtained from Montfavet 63-5 hybrid F1 seeds as internal standards of known genome size.  
788 Tomato nuclei were obtained from 1 cm<sup>2</sup> of young leaves chopped in a Petri dish with a scalpel.  
789 800 µL of a modified Galbraith buffer [65], containing 45 mM MgCl<sub>2</sub>, 30 mM Sodium-Citrate  
790 and 20 mM MOPS pH 7.0, 40 µg/mL RNase A, 0.1% Triton X-100, 5 mM sodium  
791 metabisulfite (S<sub>2</sub>O<sub>5</sub>Na<sub>2</sub>) was added. The nuclei were collected by pipetting, filtered on 70 µm  
792 mesh, and stained on ice with propidium iodide at 100 µg/mL final concentration.  
793 The samples were analyzed on a CyanADP Cytomation analyzer from Beckman-Coulter  
794 equipped with 3 lasers: 405 nm, 488 nm and 635 nm. Fluorescence intensity (PE signal in pulse-  
795 height) of the nuclei was measured at 575/25 nm, after excitation with the 488 nm laser. Results  
796 are deduced from 2C nuclei in individuals considered diploid and are given as C-values [66].  
797 The ratio of fluorescence intensity of 2C-nuclei from sample and standard allows calculation  
798 of genome size. C corresponds to the nuclear genome size (the whole chromosome complement  
799 with chromosome number n), 1C and 2C being, respectively, the DNA contents of the haploid  
800 (n) and diploid (2n) sets of chromosomes. The haploid nuclear DNA content is expressed in  
801 picograms or million base pairs, where 1 pg = 978 Mbp [67], considering Tomato 2C DNA  
802 (pg) = 1.99, according to [68]. The raw data and calculations are provided in S1 Data.

803

### 804 Micronucleus sorting by flow cytometry and flow imaging

805 To sort the MICs, the MIC-enriched samples were submitted to flow cytometry. *P. aurelia*  
806 MICs were sorted based on the SSC, FSC, DAPI (DNA staining), and GFP signals. *P. caudatum*  
807 MICs, which are bigger than *aurelia* MICs, could be sorted based on their SSC, FSC, and DAPI  
808 signals, without the use of a MIC-specific GFP fluorophore. Quality control was performed by  
809 flow cell imaging, using the ImageStreamX (Amnis/Merck Millipore) imaging flow cytometer,  
810 as previously described [5]. The MICs represented >99% of the sorted sample, except for *P.*  
811 *sonneborni* (97%). An example of sorting is shown in Fig S1.

812

### 813 Genomic DNA extraction and sequencing

814 For MAC DNA sequencing, genomic DNA was extracted from vegetative *Paramecium* cell  
815 culture after centrifugation and washes with Tris 10mM pH 7.4. For MIC DNA sequencing,  
816 DNA was extracted from the sorted MIC samples. The cell or nuclei pellet was treated with 3  
817 volumes of proteinase K solution (0.5 M EDTA pH 9; 1% N-lauroylsarcosine; 1% SDS; 1  
818 mg/mL proteinase K) at 55 °C overnight. Genomic DNA was extracted with Tris-HCl-phenol  
819 pH 8 with gentle agitation followed by dialysis against TE (10 mM Tris-HCl; 1 mM EDTA,  
820 pH 8) 25% ethanol then against Tris 1 mM pH 8. An RNase A treatment was performed on  
821 MAC DNA, followed by phenol extraction and dialysis as described above. DNA concentration  
822 was quantified using QuBit High sensibility kit (Invitrogen) and stored at 4 °C.

823 As the amounts of DNA extracted from the MIC are too low (30-50 ng), only an overlapping  
824 paired-end library could be prepared for *de novo* sequencing. Briefly, 30-50 ng of MIC DNA  
825 were sonicated using the E210 Covaris instrument (Covaris, Inc., USA) in order to generate  
826 fragments mostly around 500bp. Illumina libraries were then prepared using the NEBNext  
827 DNA Sample Prep Master Mix Set (New England Biolabs, MA, USA) and DNA fragments  
828 were PCR-amplified using Platinum Pfx DNA polymerase (Invitrogen) and P5 and P7 primers.  
829 Amplified library fragments of roughly 500 – 600 bp were size selected on 2% agarose gel.  
830 Libraries traces were validated on a Agilent 2100 Bioanalyzer (Agilent Technologies, USA)  
831 and quantified by qPCR using the KAPA Library Quantification Kit (KapaBiosystems) on a  
832 MxPro instrument (Agilent Technologies, USA). The libraries were sequenced using 251 base-

833 length read chemistry in a paired-end flow cell on the Illumina HiSeq2500 sequencer (Illumina,  
834 USA) in order to obtain overlapping reads that could be fused to generate longer reads of 400-  
835 450 bp.

836 For the MAC genomes, an overlapping paired-end library as described above and four  
837 additional mate-pair libraries (about 5Kb, 8Kb, 11Kb and 13Kb) were prepared following  
838 Nextera protocol (Nextera Mate Pair sample preparation kit, Illumina). Each library was  
839 sequenced using 100 base-length read chemistry on a paired-end flow cell on the Illumina  
840 HiSeq2000 (Illumina, USA).

841 Information about the sequencing data generated for this study is available in S5 Table.

842

#### 843 RNA extraction and sequencing

844 For the purpose of gene annotation, we sequenced mRNAs from vegetative cells (S5 Table).  
845 400 mL cultures of exponentially growing cells at 1000 cells/mL were centrifuged and flash-  
846 frozen in liquid nitrogen prior to TRIzol (Invitrogen) treatment, modified by the addition of  
847 glass beads for the initial lysis step.

848 RNA-Seq library preparation was carried out from 1 µg total RNA using the TruSeq Stranded  
849 mRNA kit (Illumina, San Diego, CA, USA), which allows mRNA strand orientation (sequence  
850 reads occur in the same orientation as anti-sense RNA). Briefly, poly(A)+ RNA was selected  
851 with oligo(dT) beads, chemically fragmented and converted into single-stranded cDNA using  
852 random hexamer priming. Then, the second strand was generated to create double-stranded  
853 cDNA. cDNAs were then 3'-adenylated, and Illumina adapters were added. Ligation products  
854 were PCR-amplified. Ready-to-sequence Illumina libraries were then quantified by qPCR using  
855 the KAPA Library Quantification Kit for Illumina Libraries (KapaBiosystems, Wilmington,  
856 MA, USA), and library profiles evaluated with an Agilent 2100 Bioanalyzer (Agilent  
857 Technologies, Santa Clara, CA, USA). Each library was sequenced using 101 bp paired end  
858 read chemistry on a HiSeq2000 Illumina sequencer.

859

860

#### 861 MAC Genome assembly

862 The MAC genomes sequenced for this project were all assembled according to the following  
863 steps.

864 First, long Illumina reads were obtained from 250 bp overlapping paired-end reads sequenced  
865 from ~450 bp fragments. The reads were fused with fastx\_mergepairs, an in-house tool  
866 developed at Genoscope using the fastx library ([http://hannonlab.cshl.edu/fastx\\_toolkit/](http://hannonlab.cshl.edu/fastx_toolkit/)). An  
867 alignment of at least 15 bp with at least 90% identity and fewer than 4 errors was required to  
868 fuse two reads into one longer read. The set of fused reads, completed with any reads that could  
869 not be fused, was assembled into contigs by the Newbler version 2.9 overlap-layout-consensus  
870 assembler, with a minimal alignment identity of 99% and a minimal alignment size of 99 bp.  
871 Scaffolds were built from the contigs using 4 Illumina mate-pair libraries with respective insert  
872 sizes of 5 kb, 8 kb, 11 kb and 13kb. The scaffolder SSpace [69] was used, with default  
873 parameters and an acceptable variation in mate-pair insert size of 25%. Gap closing was a two  
874 step process with SOAPdenovo2 GapCloser software [70]. The first step used the Illumina  
875 paired-end reads, the second step used the Illumina mate-pair libraries. Finally, Kraken software  
876 [71] and the NR nucleotide database were used to detect and remove non-eukaryotic scaffolds,  
877 owing mainly to bacterial contaminants (see below).

878

#### 879 Filtering

880 Scaffolds with a length inferior to 2kb or with a G+C content greater than 40% were filtered.

881 Contaminant scaffolds were identified and removed from the assembly provided the Kraken

882 Kmer score was superior to 10 or a BLASTN match (-evalue 1e-40 -perc\_identity 70) against  
883 RefSeq database (excluding *Paramecium* sequences) covered at least 20% of the scaffold  
884 length. If the mitochondrial genome (more or less fragmented) could be identified by a  
885 BLASTN (-evalue 1e-1 -perc\_identity 70) against the *P. tetraurelia* mitochondrial genome, the  
886 scaffold(s) were tagged as mitochondrial. A handful of chimeric scaffolds were detected and  
887 corrected in the *P. octaurelia*, *P. primaurelia* and *P. sexaurelia* assemblies by visual inspection  
888 of available long-range sequencing data (remapped mate-pairs) (see S2 Data)).  
889

#### 890 The constitutive MAC

891 Paired-end MAC DNA sequencing data were mapped on the MAC genome assembly using  
892 Bowtie2 (v.2.2.3 -local, otherwise default parameters) [72]. We defined the constitutive MAC  
893 as consisting of all regions of the assemblies with the expected average read coverage. We  
894 defined the regions of low coverage at scaffold extremities as MAC-variable regions. In relation  
895 to the MAC DNA-seq depth, a minimum expected coverage (v1.9 of samtools depth -q 10 -Q  
896 10) was defined for each assembly (*P. octaurelia* 50X, *P. pentauurelia* 35X, *P. primaurelia* 20X,  
897 and *P. sonneborni* 35X). For each scaffold extremity, a Perl script analyzed the coverage in  
898 sliding 2kb windows. The first window from the end of the scaffold with a coverage above the  
899 minimum expected coverage delimited the end of the MAC-variable regions. Only regions of  
900 minimum size 4 kb were kept. The script adjusted region ends using the MAC telomerisation  
901 sites and the ends of coding genes. After this automatic pipeline, each scaffold and mask was  
902 adjusted by eye using Circos drawings [73] (see example S2 Fig, representing DNA and RNA  
903 coverage, density in non-coding genes and positions of the MAC telomerisation sites). The  
904 positions of the regions used to reconstruct the constitutive MAC for each MAC assembly are  
905 provided in S2 Data.  
906

#### 907 IES annotation

908 Annotation of IESs was performed using the ParTIES toolkit [22] with default parameters.  
909 Briefly, this involves (i) alignment of MIC paired-end reads with a reference MAC genome to  
910 establish a catalog of potential IES insertion sites and to exclude reads that match perfectly  
911 across these sites hence do not contain IESSs; (ii) assembly of the remaining reads with Velvet  
912 to obtain contigs that may contain IESSs; (iii) alignment of the contigs with the MAC reference  
913 genome to determine the position and the sequence of the IESSs.  
914

#### 915 Gene annotation

916 Gene annotation for the 9 species was carried out using a pipeline specifically tuned for the  
917 high gene density and tiny intron size (20 – 30 nt) characteristic of *Paramecium* somatic  
918 genomes. RNA-Seq transcriptome data was used to predict transcription units with the TrUC  
919 v1.0 software (<https://github.com/oarnaiz/TrUC>), as detailed in [36]. EuGene v4.1 software  
920 [74] configured with curated *Paramecium tetraurelia* genes [36] was used for *ab initio*  
921 predictions and to combine annotation evidence (the transcription units, the *ab initio* predictions  
922 and comparative genomics evidence).  
923

#### 924 Assembly-free Genome Size Estimation

925 Illumina paired-end sequencing reads were used to estimate genome size based on counting all  
926 substrings of 17 nt in the reads, using jellyfish software version 2.2.10 [75]:  
927

```
928 jellyfish count -t 12 -C -m 17 -s 5G -o <sample.jf> <sample_paired_end_reads.fastq>  
929 jellyfish histo -o <sample.histo> <sample.jf>
```

930

931 The method for genome size estimation, described in [19,20], assumes that the total number  
932 of  $k$ -mers (in this case 17-mers) divided by the sequencing depth is a good approximation for  
933 genome size.

934 As discussed in [20] for *Paramecium* genomes, the histogram of  $k$ -mer depth for a perfect,  
935 homozygous genome with no repeated sequences (and no sequencing errors) is fit by a Poisson  
936 distribution, the peak corresponding to sequencing depth. For real genomes, the estimate of  
937 genome size is obtained by dividing the total  $k$ -mer count (excluding the peak near the origin  
938 that results from  $k$ -mers with sequencing errors) by the sequencing depth. This is  
939 straightforward for MAC genomes. For MIC genomes, variable amounts of contamination from  
940 MAC DNA lead to a second peak at higher  $k$ -mer depth corresponding to the sum of MAC-  
941 destined  $k$ -mers in the MIC DNA and the MAC  $k$ -mers in the contaminating MAC DNA. This  
942 was only a significant problem for the *P. tetraurelia*, *P. sexaurelia* and *P. sonneborni* MIC  
943 DNA samples, which were approximately corrected by assuming that a proportion of the  $k$ -  
944 mers counted from this second peak up to a depth of 500 were contributed by the contaminating  
945 MAC reads, while all the  $k$ -mers with a depth greater than 500, corresponding to highly repeated  
946 sequences, are of MIC origin (S12 Fig). The proportion of contaminating MAC DNA needed  
947 for this calculation was confirmed using IES retention scores (IRS) calculated with the MIC  
948 sequencing reads [22]. The position of the peak in the IRS distribution indicates the proportion  
949 of MIC (IRS  $\sim 1$ ) and MAC (IRS  $\sim 0$ ) DNA in the sample, as illustrated in S12 Fig.

950

#### 951 Identification of gene families

952 We performed an all against all BLASTP (ncbi-blast+ v. 2.2.30+) [76] search using the  
953 predicted protein sequences from each genome including also the proteins of *Tetrahymena*  
954 *thermophila* (June 2014 assembly <http://ciliate.org>) as an outgroup. From the resulting output  
955 we determined gene families with SiLiX v. 1.2.9 [77]. The resulting gene families were aligned  
956 with MAFFT v7.305b (2016/Aug/16) [78] using the --auto option. Gene families with less than  
957 3 genes or average pairwise identity less than 50% were excluded from downstream analyses.  
958 From the protein alignments we reconstructed the nucleotide coding sequence alignments.

959

#### 960 *Paramecium* species phylogeny

961 To reconstruct the species phylogeny, we first selected single-copy gene families present in all  
962 nine *Paramecium* species (N=1,061 genes). When available, the *T. thermophila* homolog was  
963 also included as an outgroup. We estimated the maximum likelihood phylogeny using IQtree  
964 v.1.4.2 [79], considering each gene as a separate partition. We performed model testing on each  
965 partition and chose the best codon model (determined by the largest BIC). We evaluated the  
966 results by 1,000 bootstrap replicates. All internal branches but one are supported by 100%  
967 bootstrap values (Fig 1). We will hereafter refer to this species tree inferred from single-copy  
968 gene families as *Tree1*.

969

970 The rationale for analyzing single-copy gene families is that these sets of homologous  
971 sequences are *a priori* expected to correspond to orthologs. However, given that paramecia  
972 have been subject to three rounds of whole genome duplications followed by massive gene  
973 losses [80], it is possible that some single-copy gene families include paralogs. To check  
974 whether hidden paralogs might have biased the estimation of the species tree, we used  
975 PHYLOG v.2.0beta (build 10/10/2016), a maximum likelihood method to jointly infer rooted  
976 species and gene trees, accounting for gene duplications and losses [26]. The analysis was  
977 performed using all gene families (N=13,617). The default program options were used with  
978 additionally setting a random starting species tree and BIONJ starting gene trees. The  
979 duplication and loss parameters were optimized with the average then branchwise option and  
980 the genomes were not assumed to have the same number of genes. We also ran PHYLOG

981 considering *Tree1* as the fixed species tree, and keeping the remaining options identical. The  
982 topology of the most likely species tree inferred with PHYLOGEN is almost identical to *Tree1*  
983 (it only slightly differs in the positions of *P. biaurelia* and *P. tredecaurelia*), and its likelihood  
984 is not significantly different from that obtained when running PHYLOGEN with *Tree1* as a  
985 species tree. Thus, the species tree inferred by PHYLOGEN using all gene families (N=13,617)  
986 shows no significant disagreement with the phylogeny based on single-copy gene families  
987 (*Tree1*). We therefore hereafter considered *Tree1* as the reference species tree for all our  
988 analyses. To identify duplication and speciation nodes in gene phylogenies, we computed  
989 reconciled trees for each gene family with PHYLOGEN, using *Tree1* as a species tree.

990  
991

992 Taking into account the uncertainty of IES presence due to limited detection sensitivity.

993 To identify events of IES gain and loss along the species phylogeny, it is necessary to analyze  
994 the pattern of presence/absence of IESs at homologous loci across species. One difficulty is that  
995 some IESs may remain undetected (false negatives). In particular, the sensitivity of ParTIES  
996 depends on the local read coverage [22]. To take into account the uncertainty arising from the  
997 variable local read coverage along scaffolds of each species we calculated the coverage of MIC  
998 reads mapped against the MAC genome. We identified genes with extreme values of coverage  
999 (less than the 10th percentile or more than the 90th over all genes) or with an absolute read  
1000 coverage of less than 15 reads. These genes correspond to regions with possible assembly errors  
1001 or to regions of low power to detect IESs, and we marked them as problematic for IES  
1002 annotation. IESs in these genes were considered to have an uncertain status of presence, and if  
1003 no IES was annotated the genes were marked as potentially containing IESs. To avoid issues  
1004 due to genome assembly errors, we excluded from our analyses all IESs identified on small  
1005 scaffolds (< 10 kb)

1006

1007 Taking into account the uncertainty of IES location (floating IESs).

1008 To identify homologous IES loci, i.e. that result from a single ancestral insertion event, we  
1009 searched for IESs located at a same site across homologous sequences. It should be noted that  
1010 the location of IESs, inferred from the comparison of MIC and MAC sequences, is sometimes  
1011 ambiguous. This occurs when the IES boundaries overlap a motif repeated in tandem (S13 Fig).  
1012 Such cases, hereafter called “floating IESs”, represent 7% of all IESs. In the vast majority of  
1013 cases (86%) the alternative locations of floating IESs differ by only two bp (as in the example  
1014 shown in S13 Fig), and there are less than 1% of floating IESs for which the uncertainty in IES  
1015 position exceeds 5 bp. To determine the exact location of IESs and capture the inherent  
1016 ambiguity due to possible floating IESs we used a 10bp window around each annotated IES  
1017 location to determine if the IES was classified as floating. If so, the alternative locations were  
1018 added to the IES annotation.

1019

1020 Homologous IES insertion sites

1021 To detect homologous IES loci, we compared the position of IESs within homologous genes.  
1022 To do so, we analyzed gene families with more than 3 sequences and average pairwise identity  
1023 (at the protein sequence level) of more than 50%. To avoid ambiguity in the identification of  
1024 homologous sites, we filtered protein sequence alignments with GBLOCKS v0.91b [81] and we  
1025 only retained IESs located within conserved alignment blocks. An IES insertion site spans two  
1026 nucleotides (TA). In a multiple sequence alignment including gaps, an IES locus can be larger  
1027 (e.g. T--A). Two IES loci were considered as homologous if they have at least one shared site  
1028 within the alignment (taking into account all potential locations in the case of floating IESs). In  
1029 the case of floating IESs overlapping the boundaries of conserved alignment blocks, the  
1030 presence or absence of homologous IES loci in other sequences cannot be reliably inferred. We

1031 therefore only retained IESs for which all homologs (if any) are entirely located within the  
1032 conserved alignment blocks (i.e. we discarded sets of homologous IES loci that included some  
1033 floating IESs for which some of the possible alternative positions were located outside of the  
1034 conserved alignment blocks).

1035

1036 Ancestral state reconstruction and inference of IES insertion and loss rates

1037 To explore the dynamics of IES gain and loss we used a Bayesian approach to reconstruct the  
1038 ancestral states of presence and absence of IESs using revBayes 1.0.0 beta 3 (2015-10-02) [82].  
1039 We constructed binary character matrices (presence/absence) for each gene family containing  
1040 at least one IES unambiguously located within a conserved alignment block (see above). We  
1041 assumed a model of character evolution with one rate of gain and one rate of loss sampled from  
1042 the same exponential distribution with parameter  $\alpha$  and a hyperprior sampled from an  
1043 exponential with parameter 1. We excluded from the analysis 5 gene families for which  
1044 revBayes could not compute a starting probability due to very small numbers. We used  
1045 PHYLDOG reconciled gene trees (see above) to fix gene tree topologies and branch lengths.  
1046 We ran  $5 \times 10^5$  iterations. The search parameters were optimized in an initial phase of 10,000  
1047 iterations with tuning interval 1,000. Good sampling of the parameter space was verified by  
1048 inspecting the time series and autocorrelation plots of the parameters. The convergence was  
1049 validated by inspecting the multivariate Gelman and Rubin's diagnostic plots for different  
1050 iterations.

1051

1052 Thus, for a given IES locus in a given gene family, revBayes provides an estimate of the  
1053 probability of presence of an IES at each node of the gene phylogeny. We used these  
1054 probabilities of presence along the gene phylogeny to estimate rates of IES gains or losses in  
1055 each branch of the species tree. Because of gene duplications, a given branch in the species tree  
1056 can be represented by several paths in the gene tree. Thus, we considered all paths in the gene  
1057 tree that connect the corresponding speciation nodes (see S14 Fig for a simplified example). To  
1058 measure the IES gain rate at a given IES locus ( $c$ ), in a given gene family ( $g$ ), we define  $p_{cgij}^+$   
1059 as the sum of increase in probability of presence of an IES at this locus along all paths of gene  
1060 family  $g$  connecting speciation nodes  $i$  and  $j$  (where  $i$  is a direct ancestor of  $j$ ). Let  $n_g$  be the  
1061 length in kilobase pairs of gene family  $g$  alignment (counting only well aligned sites, where the  
1062 presence of IESs can be assessed). Let  $I_g$  be the number of IES loci in family  $g$ . Let  $k_{gij}$  be the  
1063 number of paths connecting speciation nodes  $i$  and  $j$  in family  $g$ . Let  $b_{ij}$  be the branch length  
1064 connecting nodes  $i$  and  $j$  in the species tree ( $b_{ij}$  is taken here as a proxy for time). Let  $p_{gij}^+$  be  
1065 the sum of increase in probability of presence of an IES, cumulated over all IES loci in family  
1066  $g$ . We define  $p_{ij}^+$  as the sum of increase in probability of presence of an IES, cumulated over  
1067 all IES loci along the path  $i$  to  $j$  of family  $g$ . We define  $G_{ij}$  as the rate of IES gain over all gene  
1068 families ( $f$ ) along path  $ij$  expressed in number of IES gains per kilobase pairs of alignment per  
1069 unit of time:

$$G_{ij} = \frac{\sum_{g=1}^{g=f} p_{gij}^+}{\sum_{g=1}^{g=f} n_g k_{gij} \cdot b_{ij}}$$

1070

1071 We define in a similar manner the rate of IES loss. For a given gene family  $g$ , let  $p_{cgij}^-$  be the  
1072 sum of decreases in probability of presence of an IES in IES locus  $c$  along a lineage in gene  
1073 family  $g$  connecting speciation nodes  $i$  and  $j$ . Let  $I_g$  be the number of IES loci in family  $g$ . Let  
1074  $p_{gij}^-$  be the sum of decrease in probability of presence of an IES, cumulated over all IES loci in  
1075 family  $g$ . We define as  $L_{ij}$  the rate of IES loss over all gene families ( $f$ ) along path  $ij$  expressed  
1076 in number of IES losses per IES, per unit of time.

1077

$$L_{ij} = \frac{\sum_{g=1}^{g=f} P_{g_{ij}}^-}{\sum_{g=1}^{g=f} I_g \cdot k_{g_{ij}} \cdot b_{ij}}$$

1078  
1079

1080 IES age of insertion

1081 The age of first insertion for each group of homologous IES locations is defined as the age of  
1082 the most recent common ancestor of all nodes in which an ancestral IES was present with  
1083 probability larger than 99%.

1084

1085 Identification of homologous IES sequences and characterization of mobile IESs

1086 To characterize families of homologous IES sequences, we first compared all IESs (from all  
1087 species) against each other with *blastn* (ncbi blast+ v2.5.0, [76]):

1088

```
1089 blastn -evalue 1e-8 -query IES.fa -db IES -dust yes -task blastn -
```

```
1090 max_target_seqs 10000
```

1091

1092 We retained all pairs of homologous IESs for which BLAST alignments encompass the first  
1093 and last 20 nt of the query and subject sequences. This ensures that the detected sequence  
1094 homology includes the boundaries of the IESs, and is not merely due to the presence of repeated  
1095 sequences inserted within a pre-existing IES.

1096

1097 To identify potentially mobile IESs, we searched for homologous IES sequences present at  
1098 different (non-homologous) genomic loci. For this, we extracted 100 nt on each side of the IES  
1099 location, and compared all these flanking regions against each other with *blastn* (using the same  
1100 parameters as above). Pairs of homologous IES sequences with strong hits in flanking regions  
1101 ( $\geq 75\%$  identity over 150 nt or more) were classified as ‘homologous IESs at homologous loci’.  
1102 The other pairs were classified as ‘candidate mobile IESs’. We clustered each group based on  
1103 sequence similarity using SiLiX [77] with default parameters.

1104

1105 We further analyzed all clusters of candidate mobile IESs having at least 10 sequences (N=57  
1106 clusters). For each cluster, we constructed multiple sequence alignments with MAFFT v7.305b  
1107 (with `--adjustdirection` and `--auto` options). We manually inspected these  
1108 alignments to select full-length copies and create a multiple alignment covering the entire  
1109 repeated element. At this stage, we excluded 11 clusters corresponding to very AT-rich  
1110 sequences, for which it was not clear whether the detected sequence similarities were due to  
1111 homology or to their highly biased sequence composition. Furthermore, two clusters were split  
1112 into subfamilies, to include only sequences that are homologous over their entire length. We  
1113 then used these seed alignments to build an HMM profile for each repeat family and search for  
1114 homologous copies among the entire IES dataset with NHMMER version 3.1b2 [83].

1115

1116 In total, NHMMER identified 12,184 IESs having a significant hit (E-value  $< 10^{-3}$ ) in the dataset  
1117 of HMM profiles. Among detected hits, we distinguished two categories: 1) cases where the  
1118 detected repeated element is located within the IES but does not overlap with the extremities of  
1119 the IES (i.e. nested repeats), and 2) cases where the extremities of the HMM profile align with  
1120 the extremities of the IES (with a tolerance of 3 bp to allow alignment uncertainties). IESs  
1121 belonging to this latter category were hereafter considered as ‘mobile IESs’. For subsequent  
1122 analyses, we selected all families with more than 10 mobile IESs in at least one genome (N=24  
1123 families of mobile IESs). Multiple alignments, HMM profiles and the list of matching IESs are  
1124 available (<https://doi.org/10.5281/zenodo.4415828>).

1125



## 1126 Acknowledgments

1127 We thank Damien de Vienne for his help in phylogenetic analyses, Alexey Potekhin (Saint  
1128 Petersburg State University, St Petersburg, Russia) and Ewa Przybos (Institute of Systematics  
1129 and Evolution of Animals, Polish Academy of Sciences, Cracow, Poland) for the maintenance  
1130 of *Paramecium* stock collections and providing some *Paramecium aurelia* strains.  
1131

## 1132 Data availability

1133 All sequences and genome assemblies have been deposited in public databases (accession  
1134 numbers in S5 Table). All detected IESs and their annotation have been deposited at  
1135 (<https://doi.org/10.5281/zenodo.4415828>). This archive also contains the list of mobile IESs  
1136 and their alignments, the list of highly conserved IESs and their alignments.

1137 All scripts used in the analysis are available at <https://github.com/sellisid/IES>  
1138

## 1139 Funding

1140 This work was supported by the Centre National de la Recherche Scientifique, by the Agence  
1141 Nationale de la Recherche (ANR-18-CE12-0005-04; ANR-19-CE12-0015-01), and by the  
1142 Fondation de la Recherche Medicale (Equipe FRM DEQ20160334868) to S.D. It received  
1143 support under the program “Investissements d’Avenir” launched by the French Government  
1144 and implemented by ANR with the references ANR-10-LABX-54 MEMOLIFE and ANR-10-  
1145 IDEX-0001-02 PSL Research. The sequencing effort was funded by France Génomique  
1146 through involvement of the technical facilities of Genoscope (ANR-10-INBS-09-08). We  
1147 acknowledge the ImagoSeine facility, member of the France BioImaging infrastructure  
1148 supported by the ANR-10-INBS-04.  
1149

## 1150 References

- 1151
- 1152 1. Cheng C-Y, Orias E, Leu J-Y, Turkewitz AP. The evolution of germ-soma nuclear  
1153 differentiation in eukaryotic unicells. *Curr Biol.* 2020;30: R502–R510.  
1154 doi:10.1016/j.cub.2020.02.026
  - 1155 2. Betermier M, Duharcourt S. Programmed Rearrangement in Ciliates: *Paramecium*.  
1156 *Microbiol Spectr.* 2014;2. doi:10.1128/microbiolspec.MDNA3-0035-2014
  - 1157 3. Rzeszutek I, Maurer-Alcalá XX, Nowacki M. Programmed genome rearrangements in  
1158 ciliates. *Cell Mol Life Sci.* 2020. doi:10.1007/s00018-020-03555-2
  - 1159 4. Arnaiz O, Mathy N, Baudry C, Malinsky S, Aury J-M, Denby Wilkes C, et al. The  
1160 *Paramecium* Germline Genome Provides a Niche for Intragenic Parasitic DNA: Evolutionary  
1161 Dynamics of Internal Eliminated Sequences. *PLoS Genetics.* 2012;8: e1002984.  
1162 doi:10.1371/journal.pgen.1002984
  - 1163 5. Guérin F, Arnaiz O, Boggetto N, Denby Wilkes C, Meyer E, Sperling L, et al. Flow  
1164 cytometry sorting of nuclei enables the first global characterization of *Paramecium* germline  
1165 DNA and transposable elements. *BMC Genomics.* 2017;18. doi:10.1186/s12864-017-3713-7
  - 1166 6. Baudry C, Malinsky S, Restituto M, Kapusta A, Rosa S, Meyer E, et al. PiggyMac, a  
1167 domesticated piggyBac transposase involved in programmed genome rearrangements in the  
1168 ciliate *Paramecium tetraurelia*. *Genes Dev.* 2009;23: 2478–2483. doi:10.1101/gad.547309
  - 1169 7. Bischerour J, Bhullar S, Denby Wilkes C, Régnier V, Mathy N, Dubois E, et al. Six  
1170 domesticated PiggyBac transposases together carry out programmed DNA elimination in  
1171 *Paramecium*. *Elife.* 2018;7. doi:10.7554/eLife.37927
  - 1172 8. Vanssay A de, Touzeau A, Arnaiz O, Frapporti A, Phipps J, Duharcourt S. The  
1173 *Paramecium* histone chaperone Spt16-1 is required for Pgm endonuclease function in  
1174 programmed genome rearrangements. *PLOS Genetics.* 2020;16: e1008949.

- 1175 doi:10.1371/journal.pgen.1008949  
1176 9. Abello A, Régnier V, Arnaiz O, Le Bars R, Bétermier M, Bischerour J. Functional  
1177 diversification of *Paramecium* Ku80 paralogs safeguards genome integrity during precise  
1178 programmed DNA elimination. *PLoS Genet.* 2020;16: e1008723.  
1179 doi:10.1371/journal.pgen.1008723  
1180 10. Klobutcher LA, Herrick G. Consensus inverted terminal repeat sequence of  
1181 *Paramecium* IESs: resemblance to termini of Tc1-related and *Euplotes* Tec transposons.  
1182 *Nucleic Acids Res.* 1995;23: 2006–2013. doi:10.1093/nar/23.11.2006  
1183 11. Klobutcher LA, Herrick G. Developmental genome reorganization in ciliated  
1184 protozoa: the transposon link. *Prog Nucleic Acid Res Mol Biol.* 1997;56: 1–62.  
1185 doi:10.1016/s0079-6603(08)61001-6  
1186 12. Singh DP, Saudemont B, Guglielmi G, Arnaiz O, Goût J-F, Prajer M, et al. Genome-  
1187 defence small RNAs exapted for epigenetic mating-type inheritance. *Nature.* 2014;509: 447–  
1188 452. doi:10.1038/nature13318  
1189 13. Sawka-Gądek N, Potekhin A, Singh DP, Grevtseva I, Arnaiz O, Penel S, et al.  
1190 Evolutionary plasticity of mating-type determination mechanisms in *Paramecium aurelia*  
1191 sibling species. *Genome Biology and Evolution.* 2021;In press. doi:10.1093/gbe/evaa258  
1192 14. McGrath CL, Gout J-F, Johri P, Doak TG, Lynch M. Differential retention and  
1193 divergent resolution of duplicate genes following whole-genome duplication. *Genome*  
1194 *Research.* 2014;24: 1665–1675. doi:10.1101/gr.173740.114  
1195 15. McGrath CL, Gout J-F, Doak TG, Yanagi A, Lynch M. Insights into Three Whole-  
1196 Genome Duplications Gleaned from the *Paramecium caudatum* Genome Sequence. *Genetics.*  
1197 2014;197: 1417–1428. doi:10.1534/genetics.114.163287  
1198 16. Gout J-F, Johri P, Arnaiz O, Doak TG, Bhullar S, Couloux A, et al. Universal trends  
1199 of post-duplication evolution revealed by the genomes of 13 *Paramecium* species sharing an  
1200 ancestral whole-genome duplication. *bioRxiv.* 2019; 573576. doi:10.1101/573576  
1201 17. Sonneborn TM. *Paramecium aurelia*. In: King RC, editor. *Handbook of Genetics:*  
1202 *Plants, Plant Viruses, and Protists.* Boston, MA: Springer US; 1974. pp. 469–594.  
1203 doi:10.1007/978-1-4684-2994-7\_20  
1204 18. Le Mouél A, Butler A, Caron F, Meyer E. Developmentally regulated chromosome  
1205 fragmentation linked to imprecise elimination of repeated sequences in paramecia. *Eukaryotic*  
1206 *Cell.* 2003;2: 1076–1090. doi:10.1128/ec.2.5.1076-1090.2003  
1207 19. Li R, Fan W, Tian G, Zhu H, He L, Cai J, et al. The sequence and de novo assembly of  
1208 the giant panda genome. *Nature.* 2010;463: 311–317. doi:10.1038/nature08696  
1209 20. Duharcourt S, Sperling L. The Challenges of Genome-Wide Studies in a Unicellular  
1210 Eukaryote With Two Nuclear Genomes. *Meth Enzymol.* 2018;612: 101–126.  
1211 doi:10.1016/bs.mie.2018.08.012  
1212 21. Johri P, Krenek S, Marinov GK, Doak TG, Berendonk TU, Lynch M. Population  
1213 Genomics of *Paramecium* Species. *Molecular Biology and Evolution.* 2017;34: 1194–1216.  
1214 doi:10.1093/molbev/msx074  
1215 22. Denby Wilkes C, Arnaiz O, Sperling L. ParTIES: a toolbox for *Paramecium*  
1216 interspersed DNA elimination studies. *Bioinformatics.* 2016;32: 599–601.  
1217 doi:10.1093/bioinformatics/btv691  
1218 23. Mayer KM, Mikami K, Forney JD. A mutation in *Paramecium tetraurelia* reveals  
1219 functional and structural features of developmentally excised DNA elements. *Genetics.*  
1220 1998;148: 139–149.  
1221 24. Duharcourt S, Keller AM, Meyer E. Homology-dependent maternal inhibition of  
1222 developmental excision of internal eliminated sequences in *Paramecium tetraurelia*. *Mol Cell*  
1223 *Biol.* 1998;18: 7075–7085. doi:10.1128/mcb.18.12.7075  
1224 25. Przyboś E, Tarcz S, Rautian M, Sawka N. Delimiting Species Boundaries within a

- 1225 Paraphyletic Species Complex: Insights from Morphological, Genetic, and Molecular Data on  
1226 *Paramecium sonneborni* (*Paramecium aurelia* species complex, Ciliophora, Protozoa). *Protist*.  
1227 2015;166: 438–456. doi:10.1016/j.protis.2015.07.001
- 1228 26. Boussau B, Szollosi GJ, Duret L, Gouy M, Tannier E, Daubin V. Genome-scale  
1229 coestimation of species and gene trees. *Genome Research*. 2013;23: 323–330.  
1230 doi:10.1101/gr.141978.112
- 1231 27. Crooks GE, Hon G, Chandonia J-M, Brenner SE. WebLogo: a sequence logo  
1232 generator. *Genome Res*. 2004;14: 1188–1190. doi:10.1101/gr.849004
- 1233 28. Guindon S, Dufayard J-F, Lefort V, Anisimova M, Hordijk W, Gascuel O. New  
1234 algorithms and methods to estimate maximum-likelihood phylogenies: assessing the  
1235 performance of PhyML 3.0. *Syst Biol*. 2010;59: 307–321. doi:10.1093/sysbio/syq010
- 1236 29. Duret L, Cohen J, Jubin C, Dessen P, Gout J-F, Mousset S, et al. Analysis of sequence  
1237 variability in the macronuclear DNA of *Paramecium tetraurelia*: A somatic view of the  
1238 germline. *Genome Research*. 2008;18: 585–596. doi:10.1101/gr.074534.107
- 1239 30. Lhuillier-Akakpo M, Frapporti A, Denby Wilkes C, Matelot M, Vervoort M, Sperling  
1240 L, et al. Local Effect of Enhancer of Zeste-Like Reveals Cooperation of Epigenetic and cis-  
1241 Acting Determinants for Zygotic Genome Rearrangements. *PLoS Genetics*. 2014;10:  
1242 e1004665. doi:10.1371/journal.pgen.1004665
- 1243 31. Maliszewska-Olejniczak K, Gruchota J, Gromadka R, Denby Wilkes C, Arnaiz O,  
1244 Mathy N, et al. TFIIIS-Dependent Non-coding Transcription Regulates Developmental  
1245 Genome Rearrangements. *PLoS Genet*. 2015;11: e1005383.  
1246 doi:10.1371/journal.pgen.1005383
- 1247 32. Gruchota J, Denby Wilkes C, Arnaiz O, Sperling L, Nowak JK. A meiosis-specific  
1248 Spt5 homolog involved in non-coding transcription. *Nucleic Acids Res*. 2017;45: 4722–4732.  
1249 doi:10.1093/nar/gkw1318
- 1250 33. Sandoval PY, Swart EC, Arambasic M, Nowacki M. Functional diversification of  
1251 Dicer-like proteins and small RNAs required for genome sculpting. *Dev Cell*. 2014;28: 174–  
1252 188. doi:10.1016/j.devcel.2013.12.010
- 1253 34. Frapporti A, Miró Pina C, Arnaiz O, Holloch D, Kawaguchi T, Humbert A, et al. The  
1254 Polycomb protein Ezh1 mediates H3K9 and H3K27 methylation to repress transposable  
1255 elements in *Paramecium*. *Nature Communications*. 2019;10: 2710. doi:10.1038/s41467-019-  
1256 10648-5
- 1257 35. Lepère G, Bétermier M, Meyer E, Duharcourt S. Maternal noncoding transcripts  
1258 antagonize the targeting of DNA elimination by scanRNAs in *Paramecium tetraurelia*. *Genes*  
1259 *Dev*. 2008;22: 1501–1512. doi:10.1101/gad.473008
- 1260 36. Arnaiz O, Van Dijk E, Bétermier M, Lhuillier-Akakpo M, de Vanssay A, Duharcourt  
1261 S, et al. Improved methods and resources for paramecium genomics: transcription units, gene  
1262 annotation and gene expression. *BMC Genomics*. 2017;18: 483. doi:10.1186/s12864-017-  
1263 3887-z
- 1264 37. Blumenstiel JP. Birth, School, Work, Death, and Resurrection: The Life Stages and  
1265 Dynamics of Transposable Element Proliferation. *Genes*. 2019;10: 336.  
1266 doi:10.3390/genes10050336
- 1267 38. Petrov DA, Sangster TA, Johnston JS, Hartl DL, Shaw KL. Evidence for DNA Loss as  
1268 a Determinant of Genome Size. *Science*. 2000;287: 1060–1062.  
1269 doi:10.1126/science.287.5455.1060
- 1270 39. Mitra R, Fain-Thornton J, Craig NL. piggyBac can bypass DNA synthesis during cut  
1271 and paste transposition. *EMBO J*. 2008;27: 1097–1109. doi:10.1038/emboj.2008.41
- 1272 40. Cavalier-Smith T. Intron phylogeny: a new hypothesis. *Trends in Genetics*. 1991;7:  
1273 145–148. doi:10.1016/0168-9525(91)90377-3
- 1274 41. Wahl MC, Will CL, Lührmann R. The Spliceosome: Design Principles of a Dynamic

- 1275 RNP Machine. *Cell*. 2009;136: 701–718. doi:10.1016/j.cell.2009.02.009
- 1276 42. Doolittle WF. Is junk DNA bunk? A critique of ENCODE. *Proceedings of the*
- 1277 *National Academy of Sciences*. 2013;110: 5294–5300. doi:10.1073/pnas.1221376110
- 1278 43. Huff JT, Zilberman D, Roy SW. Mechanism for DNA transposons to generate introns
- 1279 on genomic scales. *Nature*. 2016;538: 533–536. doi:10.1038/nature20110
- 1280 44. Nilsen TW, Graveley BR. Expansion of the eukaryotic proteome by alternative
- 1281 splicing. *Nature*. 2010;463: 457–463. doi:10.1038/nature08909
- 1282 45. McGlincy NJ, Smith CWJ. Alternative splicing resulting in nonsense-mediated mRNA
- 1283 decay: what is the meaning of nonsense? *Trends in Biochemical Sciences*. 2008;33: 385–393.
- 1284 doi:10.1016/j.tibs.2008.06.001
- 1285 46. Lareau LF, Inada M, Green RE, Wengrod JC, Brenner SE. Unproductive splicing of
- 1286 SR genes associated with highly conserved and ultraconserved DNA elements. *Nature*.
- 1287 2007;446: 926–929. doi:10.1038/nature05676
- 1288 47. Lareau LF, Brenner SE. Regulation of Splicing Factors by Alternative Splicing and
- 1289 NMD Is Conserved between Kingdoms Yet Evolutionarily Flexible. *Molecular Biology and*
- 1290 *Evolution*. 2015;32: 1072–1079. doi:10.1093/molbev/msv002
- 1291 48. Pickrell JK, Pai AA, Gilad Y, Pritchard JK. Noisy Splicing Drives mRNA Isoform
- 1292 Diversity in Human Cells. *PLoS Genetics*. 2010;6: e1001236.
- 1293 doi:10.1371/journal.pgen.1001236
- 1294 49. Saudemont B, Popa A, Parmley JL, Rocher V, Blugeon C, Necsulea A, et al. The
- 1295 fitness cost of mis-splicing is the main determinant of alternative splicing patterns. *Genome*
- 1296 *Biology*. 2017;18: 208. doi:10.1186/s13059-017-1344-6
- 1297 50. Tress ML, Abascal F, Valencia A. Most Alternative Isoforms Are Not Functionally
- 1298 Important. *Trends in Biochemical Sciences*. 2017;42: 408–410.
- 1299 doi:10.1016/j.tibs.2017.04.002
- 1300 51. Lynch M. The Origins of Eukaryotic Gene Structure. *Molecular Biology and*
- 1301 *Evolution*. 2006;23: 450–468. doi:10.1093/molbev/msj050
- 1302 52. Lynch M. Intron evolution as a population-genetic process. *Proceedings of the*
- 1303 *National Academy of Sciences*. 2002;99: 6118–6123. doi:10.1073/pnas.092595699
- 1304 53. Hamilton EP, Kapusta A, Huvos PE, Bidwell SL, Zafar N, Tang H, et al. Structure of
- 1305 the germline genome of *Tetrahymena thermophila* and relationship to the massively
- 1306 rearranged somatic genome. *eLife*. 2016;5. doi:10.7554/eLife.19090
- 1307 54. Cheng C-Y, Young JM, Lin C-YG, Chao J-L, Malik HS, Yao M-C. The piggyBac
- 1308 transposon-derived genes TPB1 and TPB6 mediate essential transposon-like excision during
- 1309 the developmental rearrangement of key genes in *Tetrahymena thermophila*. *Genes Dev*.
- 1310 2016;30: 2724–2736. doi:10.1101/gad.290460.116
- 1311 55. Feng L, Wang G, Hamilton EP, Xiong J, Yan G, Chen K, et al. A germline-limited
- 1312 piggyBac transposase gene is required for precise excision in *Tetrahymena* genome
- 1313 rearrangement. *Nucleic Acids Research*. 2017;45: 9481–9502. doi:10.1093/nar/gkx652
- 1314 56. Cheng C-Y, Vogt A, Mochizuki K, Yao M-C. A Domesticated piggyBac Transposase
- 1315 Plays Key Roles in Heterochromatin Dynamics and DNA Cleavage during Programmed DNA
- 1316 Deletion in *Tetrahymena thermophila*. *MBoC*. 2010;21: 1753–1762. doi:10.1091/mbc.e09-
- 1317 12-1079
- 1318 57. Vogt A, Mochizuki K. A domesticated PiggyBac transposase interacts with
- 1319 heterochromatin and catalyzes reproducible DNA elimination in *Tetrahymena*. *PLoS Genet*.
- 1320 2013;9: e1004032. doi:10.1371/journal.pgen.1004032
- 1321 58. Doolittle WF, Sapienza C. Selfish genes, the phenotype paradigm and genome
- 1322 evolution. *Science*. 1980;284: 601–603.
- 1323 59. Orgel LE, Crick FHC. Selfish DNA: the ultimate parasite. *Science*. 1980;284: 604–
- 1324 607.

- 1325 60. Werren JH. Selfish genetic elements, genetic conflict, and evolutionary innovation.  
1326 Proceedings of the National Academy of Sciences. 2011;108: 10863–10870.  
1327 doi:10.1073/pnas.1102343108
- 1328 61. Krenek S, Berendonk TU, Petzoldt T. Thermal performance curves of *Paramecium*  
1329 *caudatum*: a model selection approach. *Eur J Protistol.* 2011;47: 124–137.  
1330 doi:10.1016/j.ejop.2010.12.001
- 1331 62. Lhuillier-Akakpo M, Guérin F, Frapporti A, Duhaucourt S. DNA deletion as a  
1332 mechanism for developmentally programmed centromere loss. *Nucleic Acids Res.* 2016;44:  
1333 1553–1565. doi:10.1093/nar/gkv1110
- 1334 63. Cummings DJ. Isolation and partial characterization of macro- and micronuclei from  
1335 *Paramecium aurella*. *J Cell Biol.* 1972;53: 105–115. doi:10.1083/jcb.53.1.105
- 1336 64. Freiburg M. Isolation and characterization of macronuclei of *Paramecium caudatum*  
1337 infected with the macronucleus-specific bacterium *Holospora obtusa*. *J Cell Sci.* 1985;73:  
1338 389–398.
- 1339 65. Galbraith DW, Harkins KR, Maddox JM, Ayres NM, Sharma DP, Firoozabady E.  
1340 Rapid Flow Cytometric Analysis of the Cell Cycle in Intact Plant Tissues. *Science.* 1983;220:  
1341 1049–1051. doi:10.1126/science.220.4601.1049
- 1342 66. Bourge M, Brown SC, Siljak-Yakovlev S. Flow cytometry as tool in plant sciences,  
1343 with emphasis on genome size and ploidy level assessment. *Genetics & Applications.* 2018;2:  
1344 1–12. doi:10.31383/ga.vol2iss2pp1-12
- 1345 67. Dolezel J, Bartos J, Voglmayr H, Greilhuber J. Nuclear DNA content and genome size  
1346 of trout and human. *Cytometry A.* 2003;51: 127–128. doi:10.1002/cyto.a.10013
- 1347 68. Marie D, Brown SC. A cytometric exercise in plant DNA histograms, with 2C values  
1348 for 70 species. *Biol Cell.* 1993;78: 41–51. doi:10.1016/0248-4900(93)90113-s
- 1349 69. Boetzer M, Henkel CV, Jansen HJ, Butler D, Pirovano W. Scaffolding pre-assembled  
1350 contigs using SSPACE. *Bioinformatics.* 2011;27: 578–579.  
1351 doi:10.1093/bioinformatics/btq683
- 1352 70. Luo R, Liu B, Xie Y, Li Z, Huang W, Yuan J, et al. SOAPdenovo2: an empirically  
1353 improved memory-efficient short-read de novo assembler. *Gigascience.* 2012;1: 18.  
1354 doi:10.1186/2047-217X-1-18
- 1355 71. Wood DE, Salzberg SL. Kraken: ultrafast metagenomic sequence classification using  
1356 exact alignments. *Genome Biol.* 2014;15: R46. doi:10.1186/gb-2014-15-3-r46
- 1357 72. Langmead B, Salzberg SL. Fast gapped-read alignment with Bowtie 2. *Nat Methods.*  
1358 2012;9: 357–359. doi:10.1038/nmeth.1923
- 1359 73. Krzywinski M, Schein J, Birol I, Connors J, Gascoyne R, Horsman D, et al. Circos: an  
1360 information aesthetic for comparative genomics. *Genome Res.* 2009;19: 1639–1645.  
1361 doi:10.1101/gr.092759.109
- 1362 74. Foissac S, Gouzy J, Rombauts S, Mathe C, Amselem J, Sterck L, et al. Genome  
1363 Annotation in Plants and Fungi: EuGene as a Model Platform. *Current Bioinformatics.*  
1364 2008;3: 87–97.
- 1365 75. Marçais G, Kingsford C. A fast, lock-free approach for efficient parallel counting of  
1366 occurrences of k-mers. *Bioinformatics.* 2011;27: 764–770. doi:10.1093/bioinformatics/btr011
- 1367 76. Camacho C, Coulouris G, Avagyan V, Ma N, Papadopoulos J, Bealer K, et al.  
1368 BLAST+: architecture and applications. *BMC Bioinformatics.* 2009;10: 421.  
1369 doi:10.1186/1471-2105-10-421
- 1370 77. Miele V, Penel S, Duret L. Ultra-fast sequence clustering from similarity networks  
1371 with SiLiX. *BMC Bioinformatics.* 2011;12: 116. doi:10.1186/1471-2105-12-116
- 1372 78. Katoh K, Standley DM. MAFFT multiple sequence alignment software version 7:  
1373 improvements in performance and usability. *Mol Biol Evol.* 2013;30: 772–780.  
1374 doi:10.1093/molbev/mst010

- 1375 79. Nguyen L-T, Schmidt HA, von Haeseler A, Minh BQ. IQ-TREE: a fast and effective  
1376 stochastic algorithm for estimating maximum-likelihood phylogenies. *Mol Biol Evol.*  
1377 2015;32: 268–274. doi:10.1093/molbev/msu300
- 1378 80. Aury J-M, Jaillon O, Duret L, Noel B, Jubin C, Porcel BM, et al. Global trends of  
1379 whole-genome duplications revealed by the ciliate *Paramecium tetraurelia*. *Nature.* 2006;444:  
1380 171–178. doi:10.1038/nature05230
- 1381 81. Talavera G, Castresana J. Improvement of phylogenies after removing divergent and  
1382 ambiguously aligned blocks from protein sequence alignments. *Syst Biol.* 2007;56: 564–577.  
1383 doi:10.1080/10635150701472164
- 1384 82. Höhna S, Landis MJ, Heath TA, Boussau B, Lartillot N, Moore BR, et al. RevBayes:  
1385 Bayesian Phylogenetic Inference Using Graphical Models and an Interactive Model-  
1386 Specification Language. *Syst Biol.* 2016;65: 726–736. doi:10.1093/sysbio/syw021
- 1387 83. Wheeler TJ, Eddy SR. nhmmer: DNA homology search with profile HMMs.  
1388 *Bioinformatics.* 2013;29: 2487–2489. doi:10.1093/bioinformatics/btt403
- 1389 84. Goubert C, Modolo L, Vieira C, ValienteMoro C, Mavingui P, Boulesteix M. De novo  
1390 assembly and annotation of the Asian tiger mosquito (*Aedes albopictus*) repeatome with  
1391 dnaPipeTE from raw genomic reads and comparative analysis with the yellow fever mosquito  
1392 (*Aedes aegypti*). *Genome Biol Evol.* 2015;7: 1192–1205. doi:10.1093/gbe/evv050  
1393  
1394

## 1395 Supporting information

1396

### 1397 **S1 Fig. Multi-gate flow cytometry strategy for sorting the MICs.**

1398 GFP, DAPI-positive MICs from *P. sonneborni* vegetative cells transformed with the *P.*  
1399 *tetraurelia CENH3a-GFP* transgene [62] were sorted based on size, granularity, DAPI staining  
1400 and GFP signal (see Materials and Methods). P4 and P8 were sorted separately. Based on  
1401 quality control by flow imaging (Imagestream) indicating 97% purity, the two samples P4 and  
1402 P8, which represent 1.91% of total events, were combined for DNA extraction and sequencing.  
1403 Two populations are visualized and likely correspond to 2n and 4n MICs.

1404

### 1405 **S2 Fig. Example of a MAC-variable region**

1406 Circular representation of one scaffold of ~730kb. The tracks from the exterior to the interior  
1407 of the circle: G+C content of 100nt sliding windows (black), MAC DNA-seq depth (purple),  
1408 the density in predicted non-coding genes (orange), RNA-seq depth (red) and the density of  
1409 detected telomerisation sites (green). The external blue arc shows the region identified as being  
1410 MAC-variable. These regions were determined by an automatic pipeline (see Materials and  
1411 Methods), then adjusted by eye for each scaffold.

1412

### 1413 **S3 Fig. Comparison of cytometry and k-mer MIC genome size estimates.**

1414 Flow cytometry estimates of DNA content of micronuclei and k-mer counting estimates of  
1415 genome size are described in Materials and Methods. In order to show all of the data, both axes  
1416 of the graph are log-transformed. Simple linear regression was carried out on the untransformed  
1417 data with R. The linear model that fits the data is presented as a dashed blue line;  $R^2 = 0.99$ , p-  
1418 value =  $1.3 \times 10^{-09}$ .

1419

### 1420 **S4 Fig. Repeat content of *P. caudatum* MIC genome.**

1421 **(A)** Abundance of repeat families identified by DNAPipeTE in *P. caudatum* strain My43c3d.  
1422 The repeat content of the *P. caudatum* MIC genome was analyzed with DNAPipeTE [84], using  
1423 a sample of 3,500,000 sequence reads (corresponding to a read depth of ~0.5X). DNAPipeTE  
1424 identified 67 repeat families that collectively constitute 83% of the MIC genome. Among them,  
1425 there are two major satellite repeats Sat1 and Sat2, which represent respectively 42% and 29%  
1426 of the MIC genome.

1427 **(B)** Sequences of the two major satellite repeats Sat1 and Sat2 in *P. caudatum* My43c3d (332  
1428 bp and 449 bp long). These two satellite repeats share homology over a ~200 bp-long region.  
1429 Primer sequences used for specific PCR amplification of each repeat are indicated in bold.

1430 **(C)** Detection of Sat1 and Sat2 in *P. caudatum* strains. Whole cell genomic DNA was used to  
1431 perform duplex PCR with a set of primers located within each repeat (Sat1 or Sat2, in bold  
1432 panel B) and another set of primers within the 18S ribosomal DNA as a loading control. The  
1433 expected size of the 18SrDNA PCR product was 301 bp using primers 18S\_F953:  
1434 AGACGATCAGATACCGTCGTAG and 18S\_R1300: CACCAACTAAGAACGGCCATGC.  
1435 L: 1-kb NEB ladder. Neg.: negative control (no DNA). Sat1 was amplified with primers  
1436 comp2975\_F1: **TTGTGCTGTAGGGCTCAATAAT** and comp2975\_R1:  
1437 **CTCAA AATTCGACGCTGACAA** at the expected size (198 bp) in the *P. caudatum* clade B  
1438 strains tested (My43c3d; C033; C083; C131; C147). The repeat could not be amplified in *P.*  
1439 *caudatum* DNA from clade A strains (C023; C065; C104; C119), from strain C026 or from  
1440 strain Indo\_1.6I.

1441 Sat2 was amplified with primers comp5240\_F1: TGCTGCTGATTTTGGATCTCG and  
1442 comp5240\_R1: CCGAGAACGGCCATTACAAG at the expected size (168 bp) in the *P.*  
1443 *caudatum* clade B strains tested (My43c3d; C033; C083; C131; C147). The repeat could not

1444 be amplified in *P. caudatum* DNA from clade A strains (C023; C065; C104; C119), from strain  
1445 C026 or from strain Indo\_1.6I.

1446

1447 **S5 Fig. Intragenic IES density vs. gene expression level.**

1448 Expression levels (RPKM) were measured with RNAseq datasets from vegetative cells. For  
1449 each species, expressed genes were classified into 10 bins of equal sample size according to  
1450 their expression level, and we computed the IES density within each bin. Non-expressed genes  
1451 (6.6% of the entire dataset) were excluded. (A) *Paramecium aurelia* species. (B) *P. caudatum*.

1452

1453 **S6 Fig. Dating events of IES insertion/loss.**

1454 (A) To date events of IES loss or gain, it is first necessary to identify IESs that are homologous.  
1455 For this, we aligned coding sequences (based on the protein alignment) and mapped the position  
1456 of IESs: IESs located at the exact same position within a codon were assumed to be homologous  
1457 (i.e. to result from a single ancestral insertion event). We then used the reconciled gene tree to  
1458 map events in the species phylogeny, using a maximum likelihood approach (see methods).  
1459 The example shown here corresponds to a gene family encoding a putative RNA 3'-terminal  
1460 phosphate cyclase (PTET.51.1.P0920097, POCTA.138.1.P0960088,  
1461 PBIA.V1\_4.1.P01950012, PTRED.209.2.P71800001293600070, PPENT.87.1.P1090087,  
1462 PPRIM.AZ9-3.1.P0020612, PSON.ATCC\_30995.1.P0860097, PSEX.AZ8\_4.1.P0910047,  
1463 PCAU.43c3d.1.P00760109). The positions of IESs are indicated by red rectangles. (B) The  
1464 presence of IESs (red bars) within each of these genes is indicated with regard to the species  
1465 phylogeny. Six distinct IESs were identified in this gene family: IES2 is shared by all species  
1466 and therefore predates the divergence between *P. caudatum* and the *aurelia* clade; IES4 most  
1467 probably corresponds to a gain in the *P. sexaurelia* lineage; IES5 and IES6 predate the  
1468 divergence of the *aurelia* clade and have been subsequently lost in the *P. tetraurelia*/*P.*  
1469 *octaurelia* lineage; IES1 might correspond to a gain at the base of the *aurelia* clade or a loss in  
1470 the *P. caudatum* lineage (and vice versa for IES3).

1471

1472 **S7 Fig. Prevalence of weak IESs.**

1473 (A) Proportion of weak IESs (i.e. IESs with a retention frequency  $\geq 10\%$  in WT vegetative cells)  
1474 among IESs located in different genomic compartments. (B) Proportion of weak IESs  
1475 according to the age of IESs (for IESs located in coding regions): New = species-specific IES;  
1476 Old = IES predating the divergence between *P. caudatum* and the *aurelia* lineage. The number  
1477 of new IESs is indicated for each species. Species codes: pso: *P. sonneborni*, ptr: *P.*  
1478 *tredecaurelia*, pte: *P. tetraurelia*, pbi: *P. biaurelia*, poc: *P. octaurelia*, pse: *P. sexaurelia*, ppr:  
1479 *P. primaurelia*, ppe: *P. pentaurelia*, pca: *P. caudatum*

1480

1481 **S8 Fig. Length distribution of IESs according to their age.**

1482 Comparison of the length distribution of IESs according to their age (for the subset of datable  
1483 IESs located in coding regions). The age of an IES site is defined as in Fig. 3. Results for other  
1484 species are shown in Fig. 4.

1485

1486 **S9 Fig. Genomic distribution of IESs according to their length.**

1487 Green bars indicate the percentage of IESs located in each compartment of the MAC genome  
1488 (introns, protein-coding regions, intergenic regions) for each species. Grey bars indicate the  
1489 percentage of the MAC genome in each compartment. (A) Long IESs (>100 bp). (B) Short IESs  
1490 (<35 bp).

1491

1492 **S10 Fig. A highly conserved IES contributes to the regulation of gene expression.**



1493 The IES family FAM\_9405 is present at the 5' end of a protein-coding gene of unknown  
1494 function, expressed at a high level, specifically during autogamy. The IES overlaps the  
1495 beginning of the first exon, including the 5'UTR and the first codons. Excision of the IES during  
1496 MAC development leads to the loss of the initiation codon and of the promoter region, and  
1497 thereby to the silencing of this gene in vegetative cells. (A) Gene structure and expression level  
1498 during autogamy in *P. tetraurelia*. The IES is displayed in red. The position of the translation  
1499 start site is indicated by a red arrow. (B) Alignment of homologous IESs across *aurelia* species.  
1500 The N-terminal end of the encoded protein is shown below.

1501  
1502 **S11 Fig. The vast majority of IESs correspond to unique sequences.**  
1503 For each species, all IESs were compared against each other with BLASTN (with an E-value  
1504 threshold of  $10^{-5}$ ). The distribution of the number of BLAST hits per IES (excluding self-hits)  
1505 is displayed for each species.

1506  
1507 **S12 Fig. Estimating the proportion of MIC and MAC DNA in the sample based on IES**  
1508 **retention score.**

1509 The histograms on the left show the k-mer depth profiles. The peak at the origin can be  
1510 attributed to sequencing errors (k-mers that occur only once or a few times). The position of  
1511 the largest peak beyond the origin corresponds to k-mers present once in the genome and  
1512 provides the sequencing depth. As *Paramecium aurelia* genomes have undergone whole  
1513 genome duplications, there are a significant number of k-mers at 2X and even 4X the  
1514 sequencing depth arising from genes (or regions of genes) present in 2 or 4 copies, clearly  
1515 visible for *P. octaurelia* and *P. primaurelia*. The profile for *P. tetraurelia* however has a first  
1516 peak (MIC sequences that occur once) at 31X followed by a larger peak that is not at the 2X  
1517 position as it arises because of MAC DNA contamination. The column on the right shows  
1518 histograms of IES retention scores. Only the *P. tetraurelia* sample is significantly contaminated  
1519 by MAC DNA: the average IES retention score of 0.4 indicates 40% MIC and 60% MAC DNA  
1520 in this sample.

1521  
1522 **S13 Fig. Example of floating IES.**  
1523 Comparison of MIC and MAC sequences indicates the presence of an IES at this locus.  
1524 However, because of the presence of a repeated motif at the boundaries of the IES (blue arrows),  
1525 it is not possible to determine which of the two possible segments (IES-1 in black or IES-2 in  
1526 red) is actually excised *in vivo*. Such IESs that cannot be unambiguously positioned are called  
1527 'floating IESs'. They represent 6.8% of the 400,254 IESs detected across all species. In the vast  
1528 majority of cases (86%) the alternative locations of floating IESs differ by only two bp (as in  
1529 the example shown here), and there are less than 1% of floating IESs for which the uncertainty  
1530 in IES position exceeds 5 bp.

1531  
1532 **S14 Fig. Measuring the rate of IES gain or loss along the species phylogeny.**  
1533 To illustrate our methodology, we show here an example of a gene family with 3 genes, two  
1534 from *P. sonneborni* (pson1, pson2) and one from *P. sexaurelia* (psex1). Two IES loci are found  
1535 in this family (A, B). The probability of presence of an IES (estimated by Bayesian ancestral  
1536 state reconstruction - see methods) is indicated by shaded circles for each locus at each node of  
1537 the gene phylogeny. We focus here on the branch of the species tree leading from the common  
1538 ancestor of *P. sexaurelia* and *P. sonneborni* to the leaf node of *P. sonneborni* (the red branch  
1539 in the species tree, shown in insert). The length of this branch ( $b$ ), is taken as a proxy for time.  
1540 Because of a duplication event, this branch of the species tree corresponds to two paths in the  
1541 gene tree ( $k=2$ ). To estimate the IES gain rate, we calculate for each path the sum of increase  
1542 in the probability of presence of an IES, for all IES loci ( $p^+$ ). Along the first path (from the root

1543 to pson1), we have  $p^+A1=0.5$  and  $p^+B1=0$ . Along the second path (from the root to pson2), we  
1544 have  $p^+A2=0.5$  and  $p^+B2=0$ . The average gain rate along all paths, per unit of time and per bp,  
1545 is thus given by  $G=(p^+A1 + p^+B1 + p^+A2 + p^+B2)/(k \times b \times n_g)$ , where  $n_g$  is the number of well  
1546 aligned sites in the gene family alignment (i.e. the number of sites where the presence of  
1547 homologous IESs can be assessed). Similarly, to estimate the IES loss rate, we calculate for  
1548 each path the sum of decrease in the probability of presence of an IES, for all IES loci ( $p^-$ ).  
1549 Along the first path (from the root to pson1), we have  $p^-A1=0$  and  $p^-B1=0.4$ . Along the second  
1550 path (from the root to pson2), we have  $p^-A2=0$  and  $p^-B2=0.4$ . The average gain rate along all  
1551 paths, per unit of time and per bp, is thus given by  $L=(p^-A1 + p^-B1 + p^-A2 + p^-B2)/(k \times b \times I)$ ,  
1552 where  $I$  is the number of IES loci in the gene family (here  $I=2$ ).  
1553

1554 **S1 Table: MIC genome sequencing data.**

1555

1556 **S2 Table. MAC genome assemblies used in this study.**

1557 The assemblies of the four MAC genomes sequenced in the course of this project include both  
1558 ‘constitutive MAC’ regions (i.e. regions that are always retained in the MAC) and ‘MAC-  
1559 variable regions’ (i.e. regions that are mostly restricted to the MIC, but that are retained at low  
1560 frequency in MAC nuclei). The size and content of these two types of regions are indicated.  
1561

1562 **S3 Table. Distribution of IESs in different genomic compartments.**

1563 Values in parentheses indicate the proportions expected under the hypothesis of uniform IES  
1564 distribution along MAC-destined regions.  
1565

1566 **S4 Table. Highly conserved IESs that are transcribed during MAC development and/or**  
1567 **associated to genes that are upregulated during MAC development.** The transcription level  
1568 of IESs is indicated for different stages during MAC development (S, T0 to T45) and in  
1569 vegetative cells (V) [36]. Only *P. tetraurelia* IESs are shown in the table, because this is the  
1570 only species for which developmental transcriptome data is available [36]. (\*) The IES  
1571 pte.MICA.16.324097 (FAM\_4968) contains a complete protein-coding gene, which is  
1572 expressed during development (HTH CenpB-type DNA-binding domain see Fig. 5). The gene  
1573 in which this IES is inserted (PTET.51.1.P0160202) is not specifically expressed during  
1574 development.  
1575

1576 **S5 Table. Sequencing data generated for this study.**

1577

1578 **S1 Data. Flow cytometry-based estimations of MIC genome size in *Paramecium*.**

1579

1580 **S2 Data. Locations of MAC-variable regions and MAC assembly curation**

1581 This file provides the positions of MAC-variable regions identified in the MAC assemblies of  
1582 *P. octaurelia*, *P. pentaurella*, *P. primaurelia*, and *P. sonneborni*. In addition, it indicates the  
1583 positions of putative assembly chimeras that have been identified in *P. octaurelia*, *P.*  
1584 *primaurelia* and *P. sexaurelia*.  
1585

## Figures

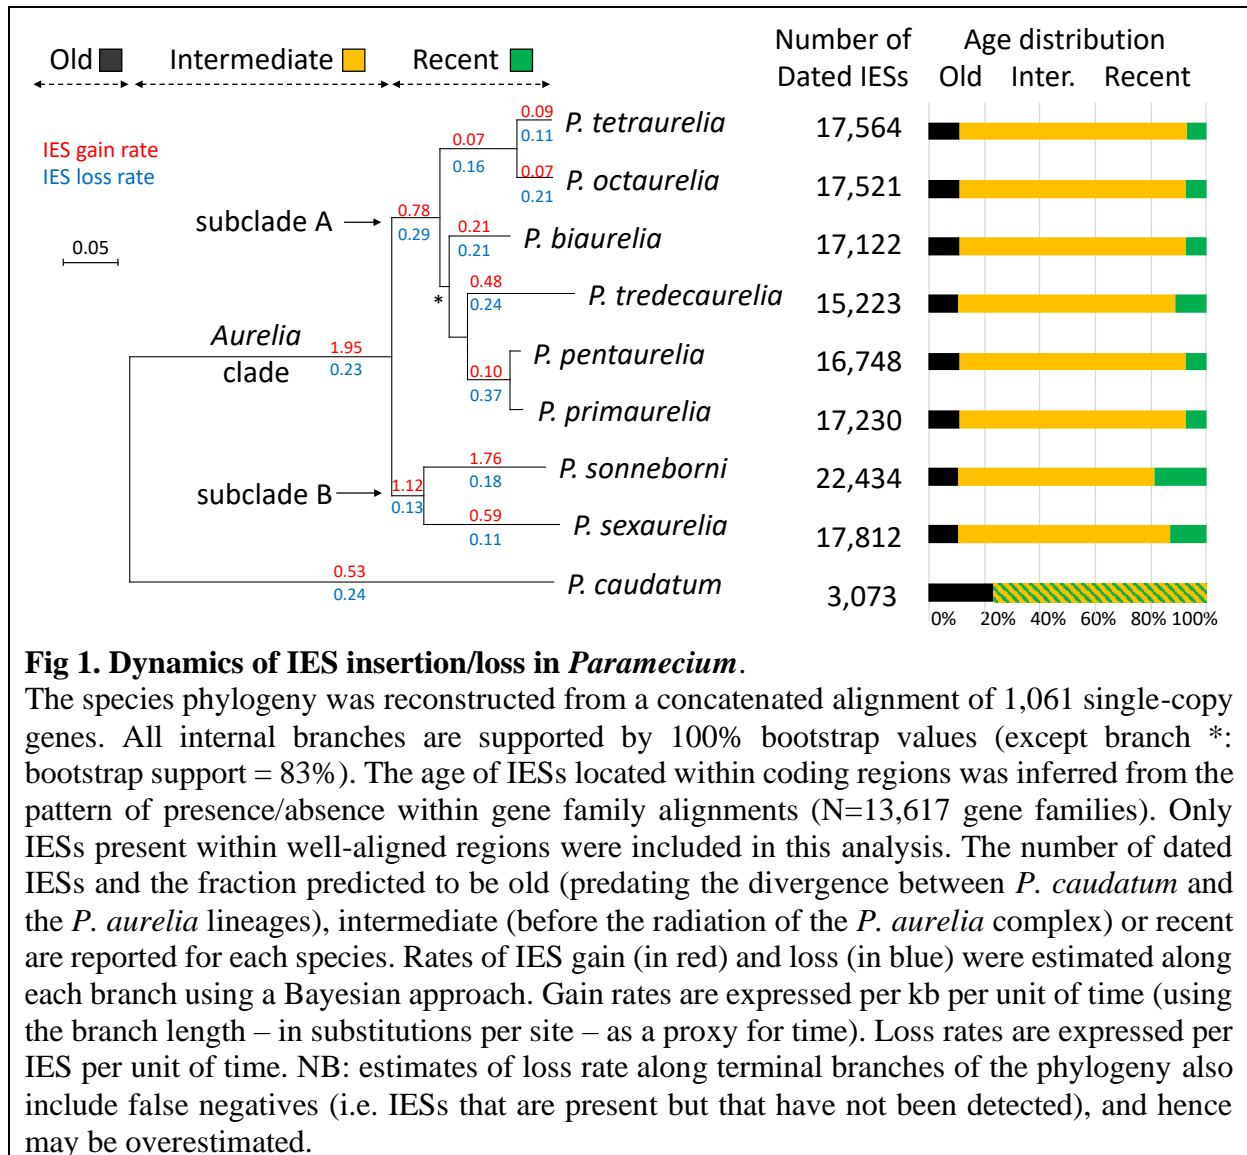

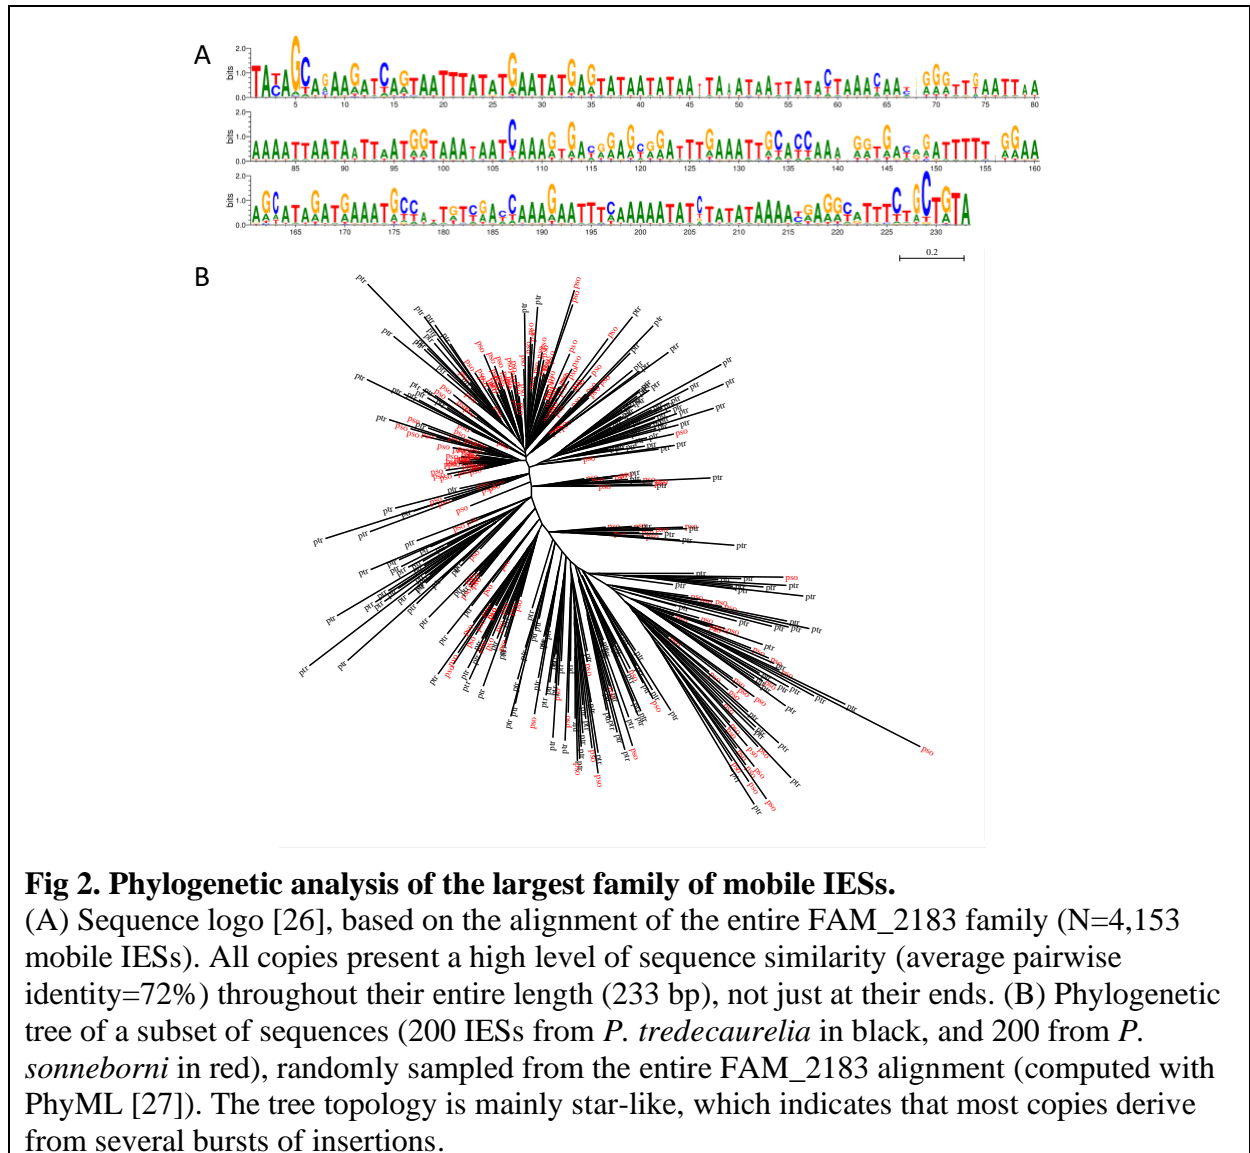

**Fig 2. Phylogenetic analysis of the largest family of mobile IESs.**

(A) Sequence logo [26], based on the alignment of the entire FAM\_2183 family (N=4,153 mobile IESs). All copies present a high level of sequence similarity (average pairwise identity=72%) throughout their entire length (233 bp), not just at their ends. (B) Phylogenetic tree of a subset of sequences (200 IESs from *P. tredecaurelia* in black, and 200 from *P. sonneborni* in red), randomly sampled from the entire FAM\_2183 alignment (computed with PhyML [27]). The tree topology is mainly star-like, which indicates that most copies derive from several bursts of insertions.

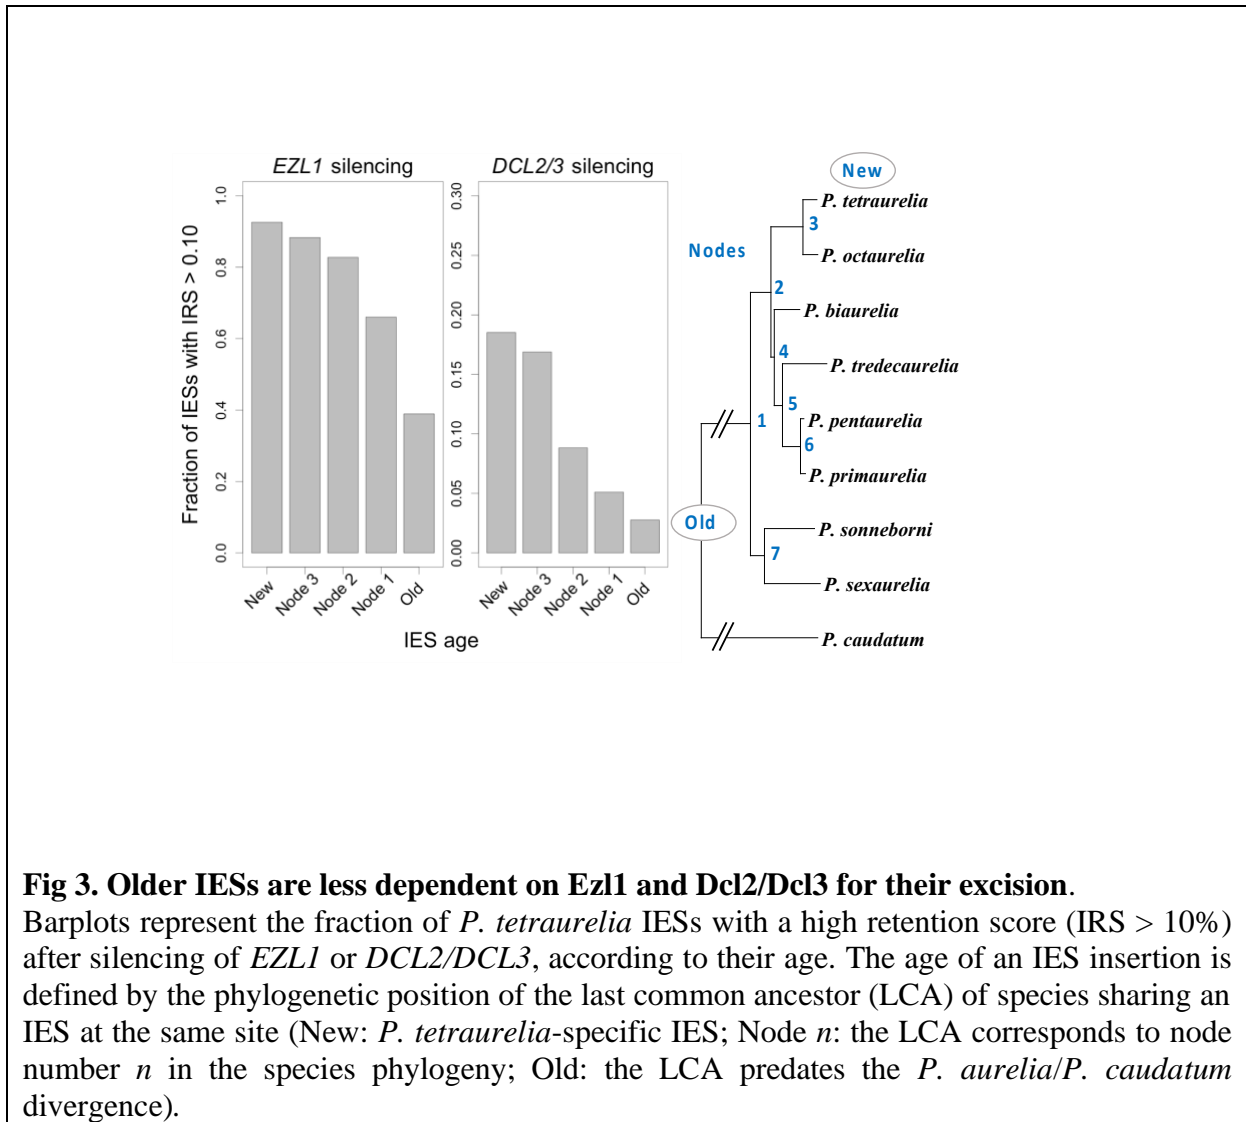

**Fig 3. Older IESs are less dependent on Ezl1 and Dcl2/Dcl3 for their excision.**

Barplots represent the fraction of *P. tetraurelia* IESs with a high retention score (IRS > 10%) after silencing of *EZL1* or *DCL2/DCL3*, according to their age. The age of an IES insertion is defined by the phylogenetic position of the last common ancestor (LCA) of species sharing an IES at the same site (New: *P. tetraurelia*-specific IES; Node *n*: the LCA corresponds to node number *n* in the species phylogeny; Old: the LCA predates the *P. aurelia*/*P. caudatum* divergence).

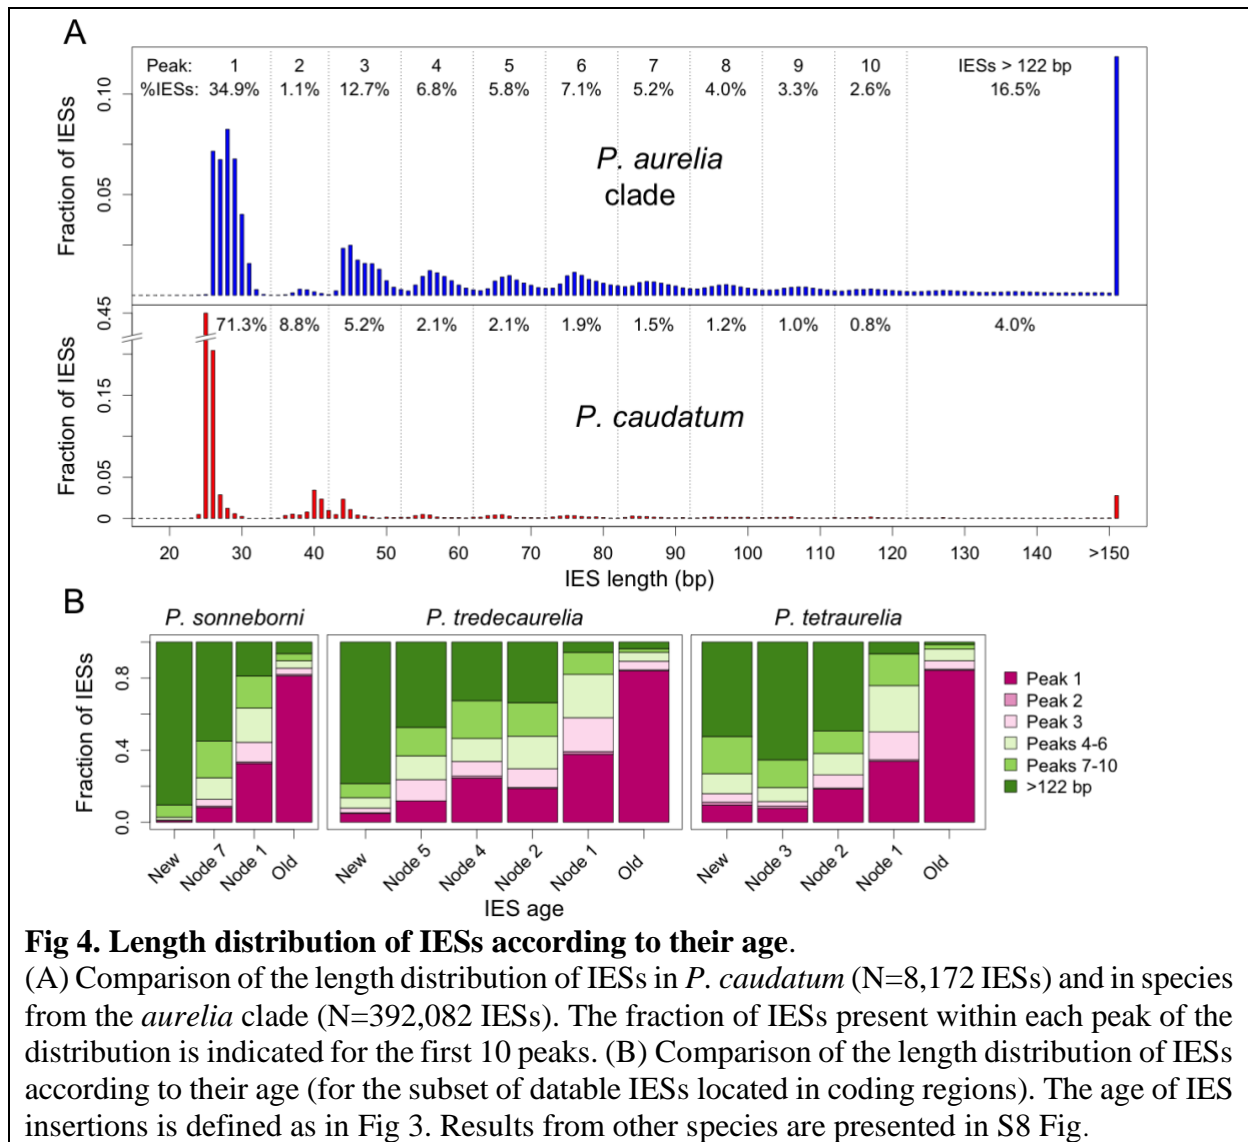

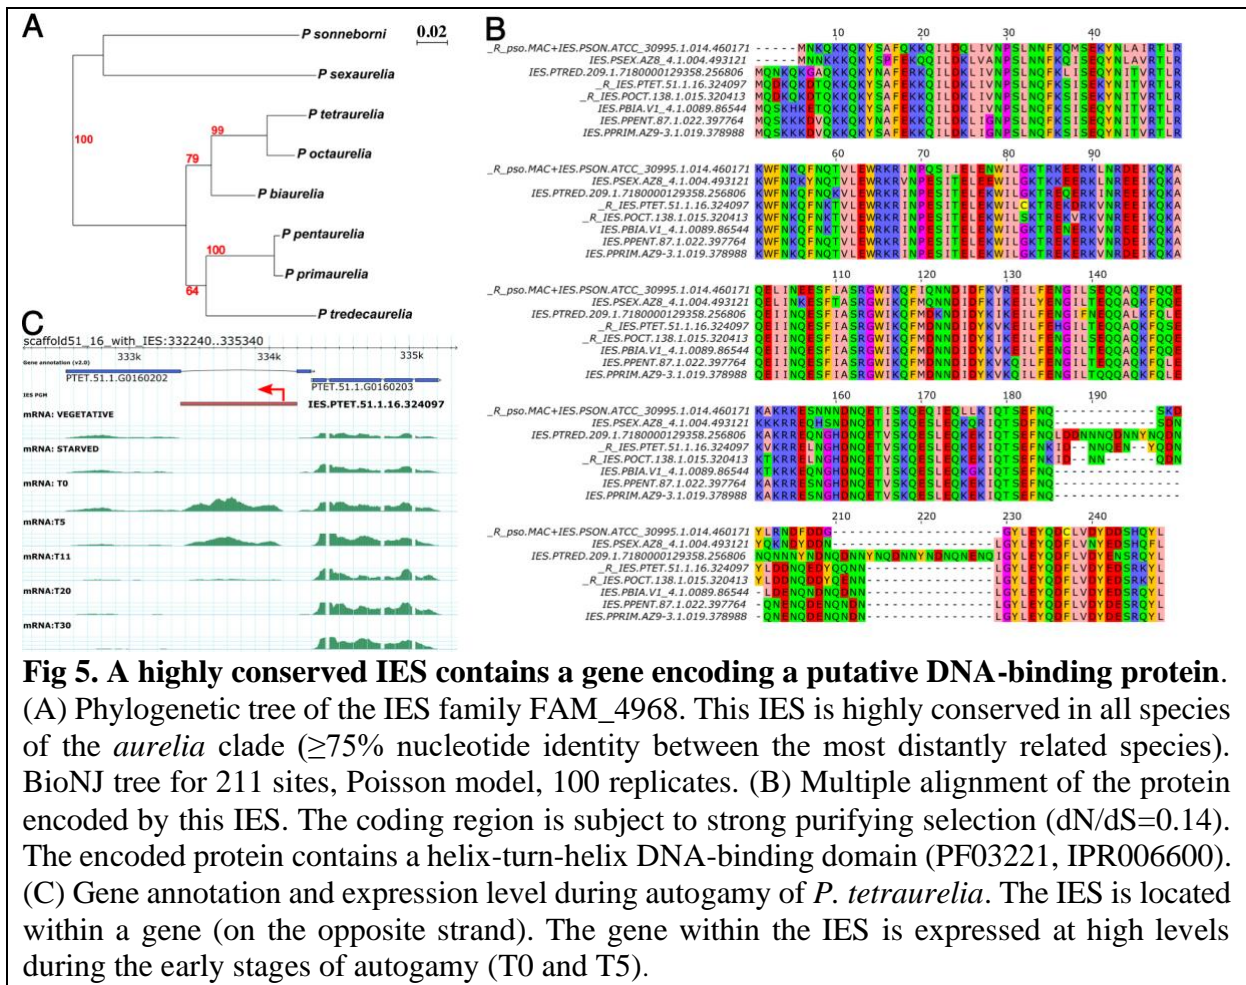

## Supplementary Figures

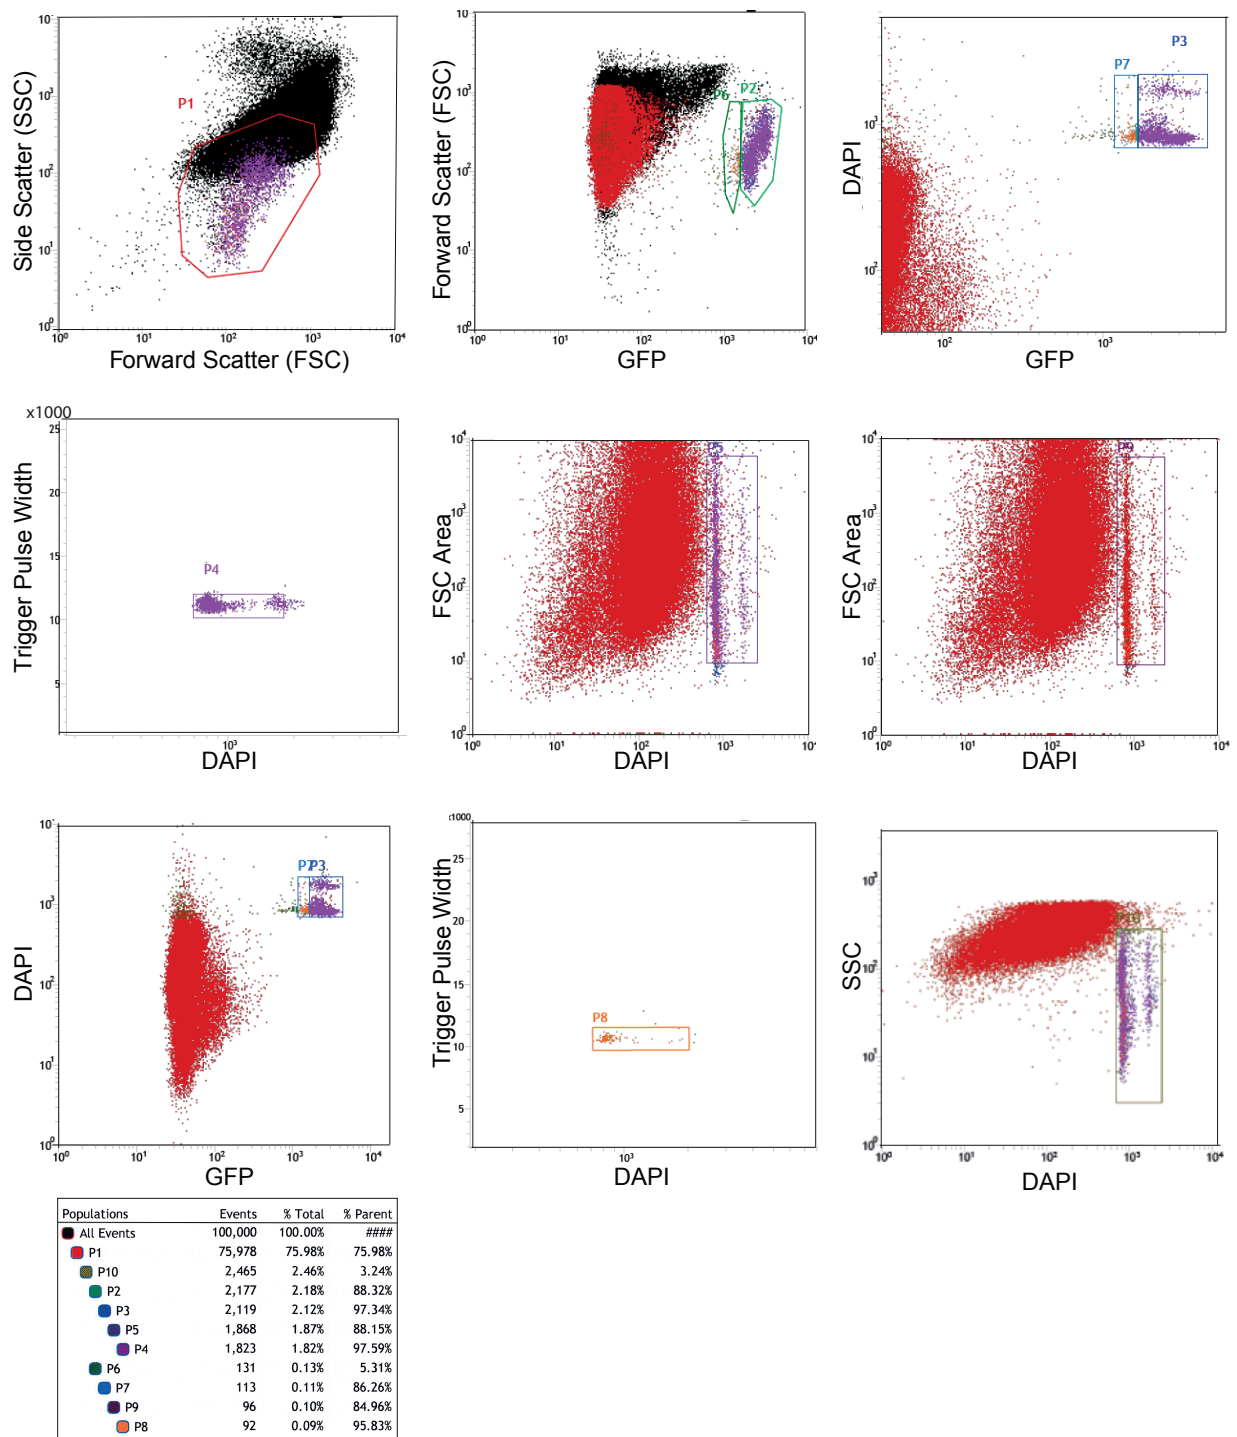

### S1 Fig. Multi-gate flow cytometry strategy for sorting the MICs.

GFP, DAPI-positive MICs from *P. sonneborni* vegetative cells transformed with the *P. tetraurelia* CENH3a-GFP transgene [60] were sorted based on size, granularity, DAPI staining and GFP signal (see Materials and Methods). P4 and P8 were sorted separately. Based on quality control by flow imaging (Imagestream) indicating 97% purity, the two samples P4 and P8, which represent 1.91% of total events, were combined for DNA extraction and sequencing. Two populations are visualized and likely correspond to 2n and 4n MICs.



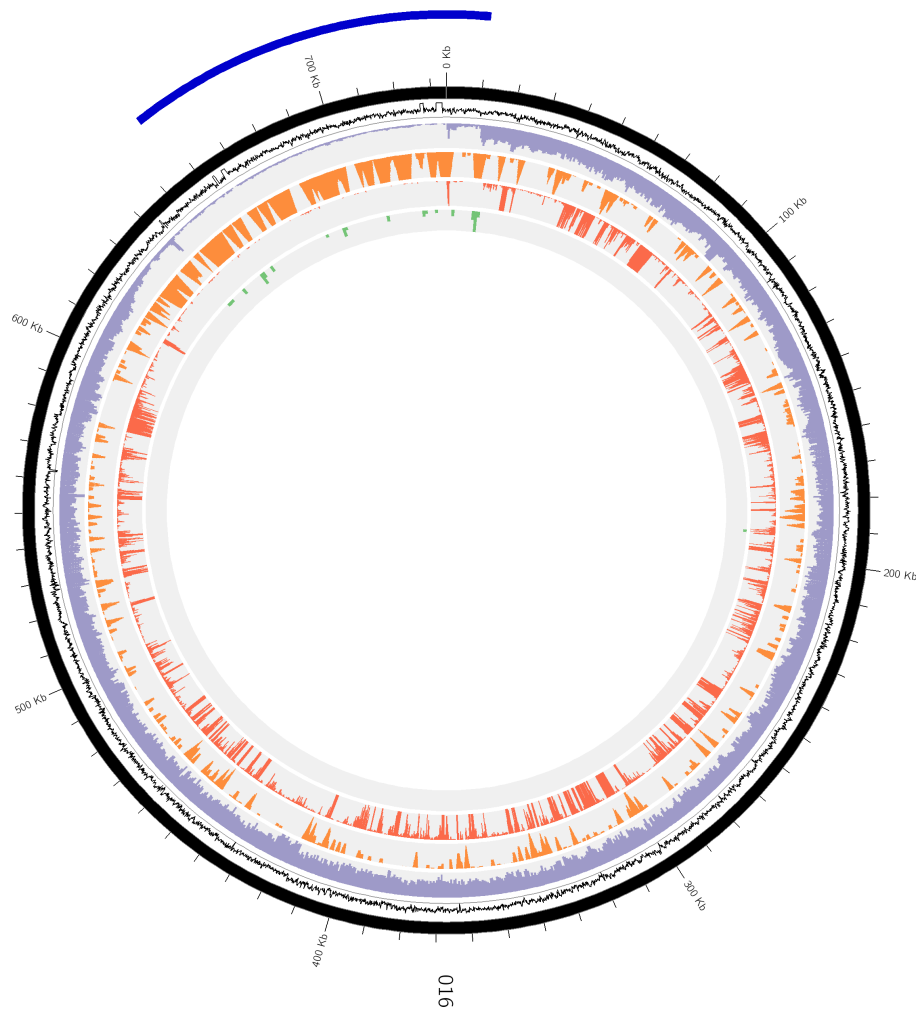

### **S2 Fig. Example of a MAC-variable region**

Circular representation of one scaffold of ~730kb. The tracks from the exterior to the interior of the circle: G+C content of 100nt sliding windows (black), MAC DNA-seq depth (purple), the density in predicted non-coding genes (orange), RNA-seq depth (red) and the density of detected telomerisation sites (green). The external blue arc shows the region identified as being MAC-variable. These regions were determined by an automatic pipeline (see Materials and Methods) then adjusted by eye for each scaffold.

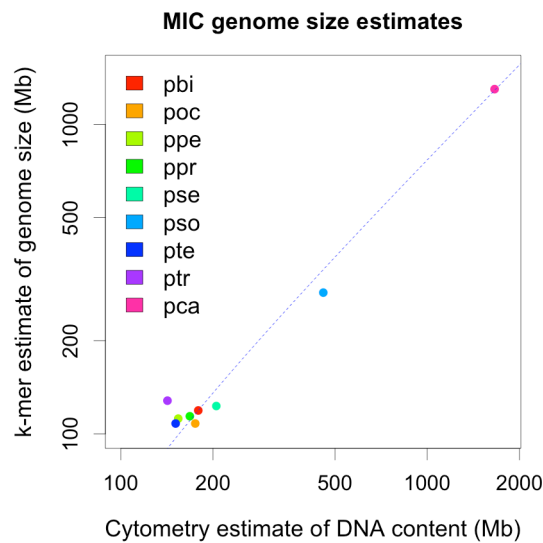

**S3 Fig. Comparison of cytometry and k-mer MIC genome size estimates.**

Flow cytometry estimates of DNA content of micronuclei and k-mer counting estimates of genome size are described in Materials and Methods. In order to show all of the data, both axes of the graph are log-transformed. Simple linear regression was carried out on the untransformed data with R. The linear model that fits the data is presented as a dashed blue line;  $R^2 = 0.99$ ,  $p$ -value =  $1.3 \times 10^{-09}$ .

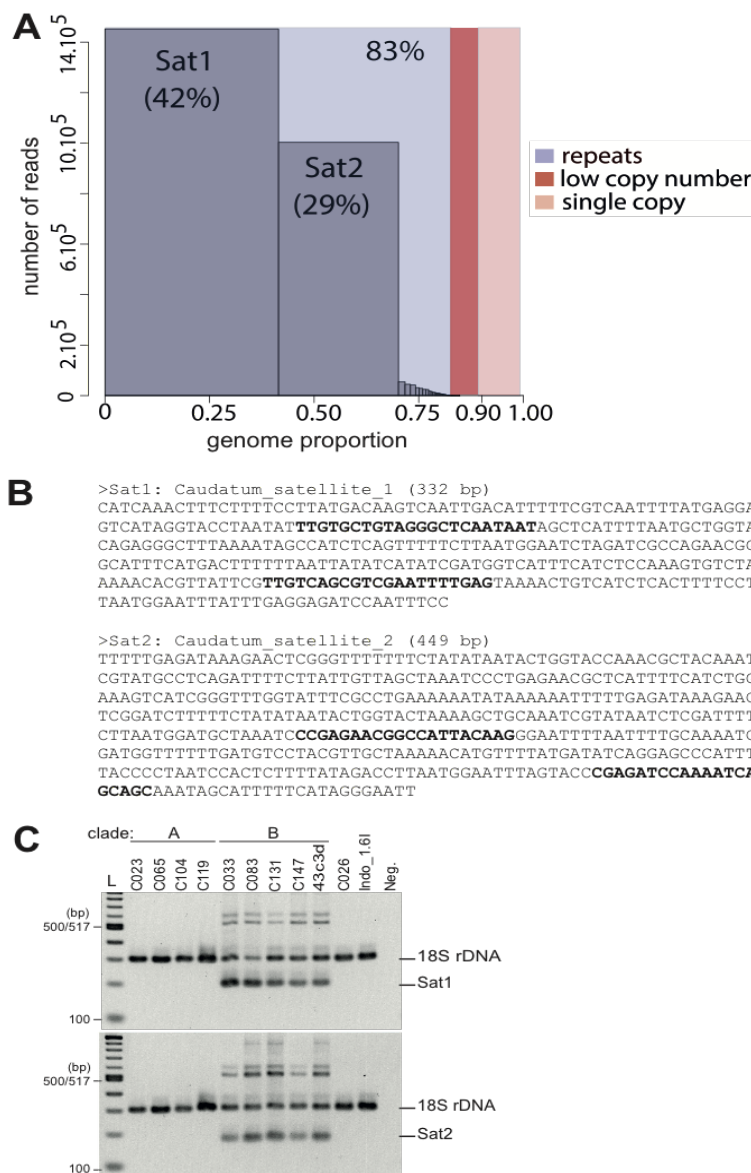

#### S4 Fig. Repeat content of *P. caudatum* MIC genome.

(A) Abundance of repeat families identified by DNAPipeTE in *P. caudatum* strain My43c3d. The repeat content of *P. caudatum* MIC genome was analyzed with DNAPipeTE [82], using a sample of 3,500,000 sequence reads (corresponding to a read depth of ~0.5X). DNAPipeTE identified 67 repeat families that collectively constitute 83% of the MIC genome. Among them, there are two major satellite repeats Sat1 and Sat2, which represent respectively 42% and 29% of the MIC genome.

(B) Sequences of the two major satellite repeats Sat1 and Sat2 in *P. caudatum* My43c3d (332 bp and 449 bp long). These two satellite repeats share homology over a ~200 bp-long region. Primer sequences used for specific PCR amplification of each repeat are indicated in bold.

(C) Detection of Sat1 and Sat2 in *P. caudatum* strains. Whole cell genomic DNA was used to perform duplex PCR with a set of primers located within each repeat (Sat1 or Sat2, in bold panel B) and another set of primers within the 18S ribosomal DNA as a loading control. The expected size of the 18SrDNA PCR product was 301 bp using primers 18S\_F953: AGACGATCAGATACCGTCGTAG and 18S\_R1300: CACCAACTAAGAACGGCCATGC. L: 1-kb NEB ladder. Neg.: negative control (no DNA). Sat1 was amplified with primers comp2975\_F1: TTGTGCTGTAGGGCTCAATAAT and comp2975\_R1: CTCAAAATTCGACGCTGACAA at the expected size (198 bp) in the *P. caudatum* clade B strains tested (My43c3d; C033; C083; C131; C147). The repeat could not be amplified in *P. caudatum* DNA from clade A strains (C023; C065; C104; C119), from strain C026 or from strain Indo\_1.6I.

Sat2 was amplified with primers comp5240\_F1: TGCTGCTGATTTGGATCTCG and comp5240\_R1: CCGAGAACGGCCATTACAAG at the expected size (168 bp) in the *P. caudatum* clade B strains tested (My43c3d; C033; C083; C131; C147). The repeat could not be amplified in *P. caudatum* DNA from clade A strains (C023; C065; C104; C119), from strain C026 or from strain Indo\_1.6I.

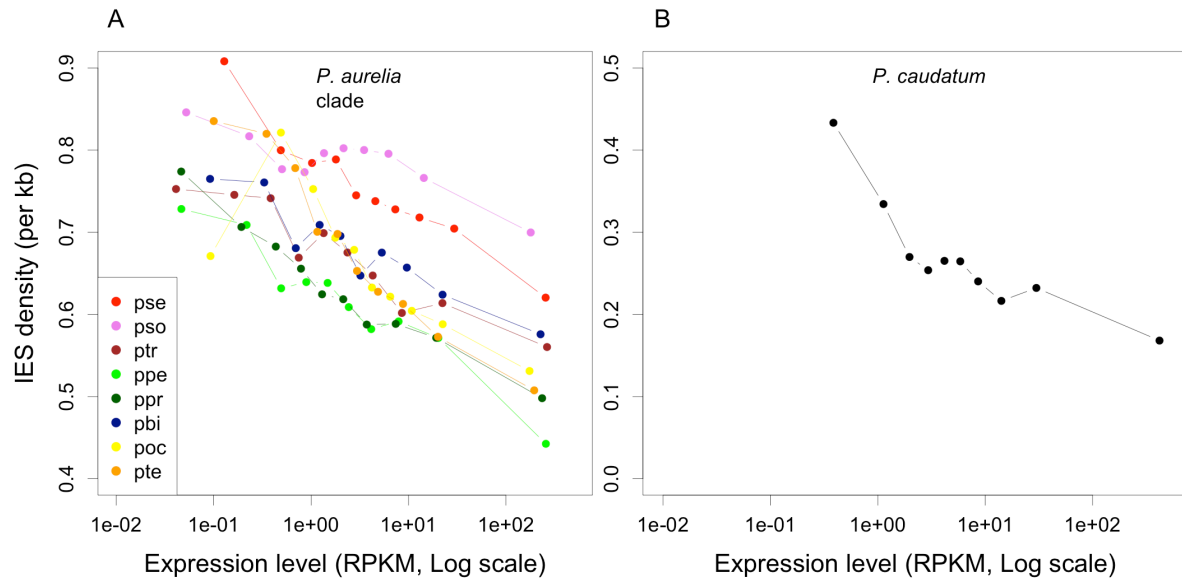

**S5 Fig. Intragenic IES density vs. gene expression level.**

Expression levels (RPKM) were measured with RNAseq datasets from vegetative cells. For each species, expressed genes were classified into 10 bins of equal sample size according to their expression level, and we computed the IES density within each bin. Non-expressed genes (6.6% of the entire dataset) were excluded. (A) *Paramecium aurelia* species. (B) *P. caudatum*.

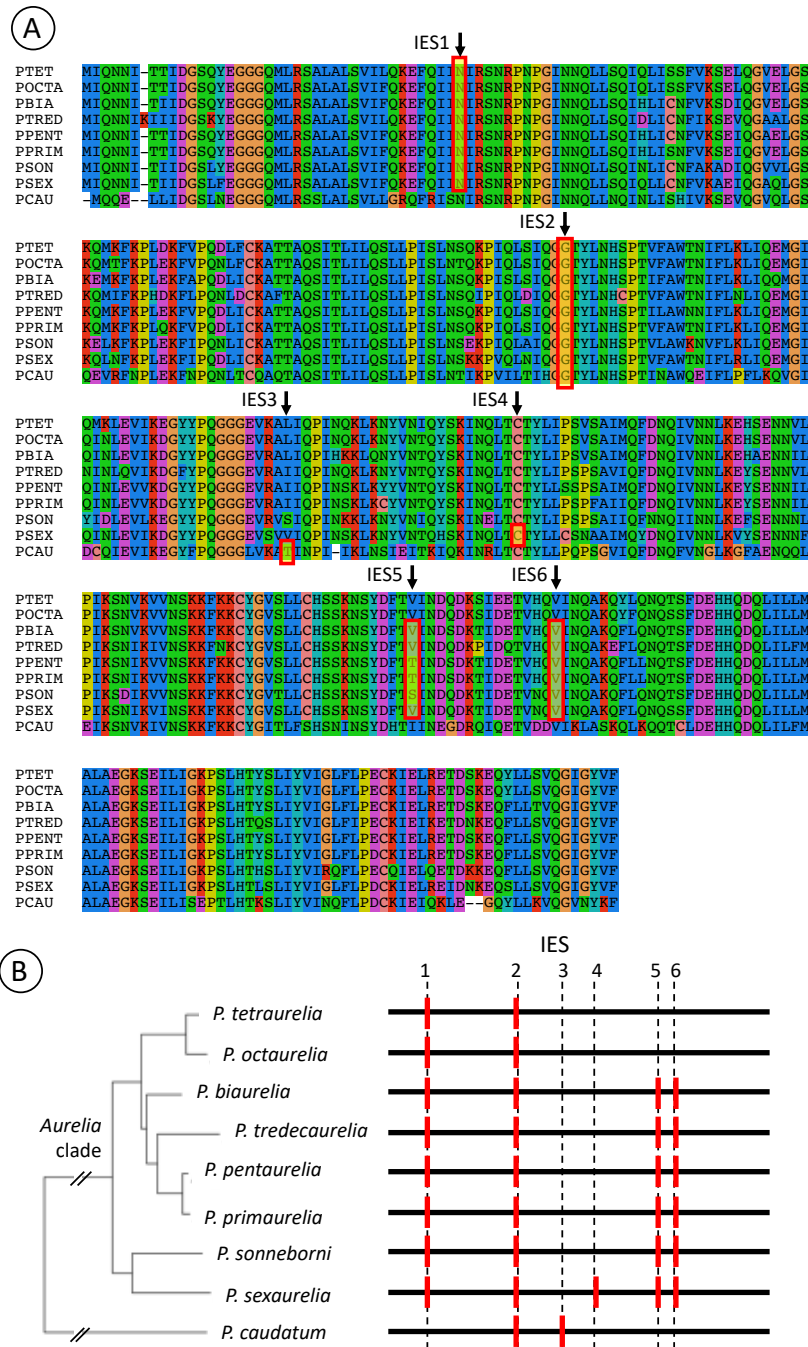

**S6 Fig. Dating events of IES insertion/loss.**

(A) To date events of IES loss or gain, it is first necessary to identify IESs that are homologous. For this, we aligned coding sequences (based on the protein alignment) and mapped the position of IESs: IESs located at the exact same position within a codon were assumed to be homologous (i.e. to result from a single ancestral insertion event). We then used the reconciled gene tree to map events in the species phylogeny, using a maximum likelihood approach (see methods). The example shown here corresponds to a gene family encoding a putative RNA 3'-terminal phosphate cyclase (PTET.51.1.P0920097, POCTA.138.1.P0960088, PBIA.V1\_4.1.P01950012, PTRED.209.2.P71800001293600070, PPENT.87.1.P1090087, PPRIM.AZ9-3.1.P0020612, PSON.ATCC\_30995.1.P0860097, PSEX.AZ8\_4.1.P0910047, PCAU.43c3d.1.P00760109). The positions of IESs are indicated by red rectangles.

(B) The presence of IESs (red bars) within each of these genes is indicated with regard to the species phylogeny. Six distinct IESs were identified in this gene family: IES2 is shared by all species and therefore predates the divergence between *P. caudatum* and the *aurelia* clade; IES4 most probably corresponds to a gain in the *P. sexaurelia* lineage; IES5 and IES6 predate the divergence of the *aurelia* clade and have been subsequently lost in the *P. tetraurelia*/*P. octaurelia* lineage; IES1 might correspond to a gain at the base of the *aurelia* clade or a loss in the *P. caudatum* lineage (and vice versa for IES3).

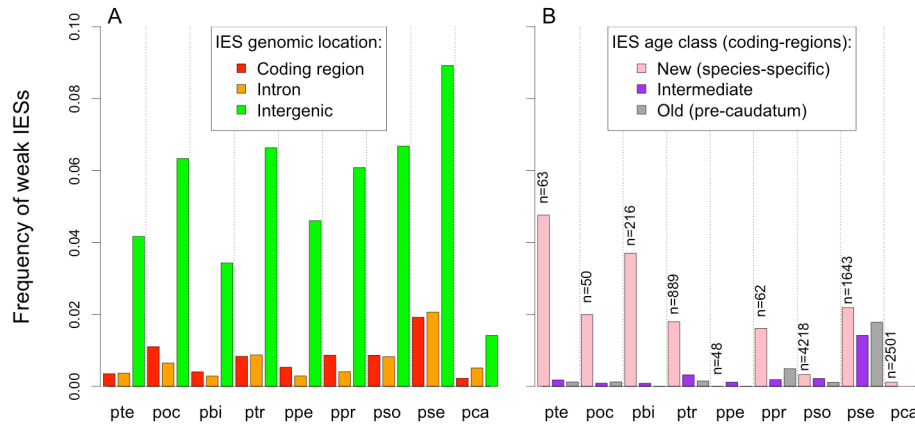

**S7 Fig. Prevalence of weak IESs.**

(A) Proportion of weak IESs (i.e. IESs with a retention frequency  $\geq 10\%$  in WT vegetative cells) among IESs located in different genomic compartments.

(B) Proportion of weak IESs according to the age of IESs (for IESs located in coding regions): New = species-specific IES; Old = IES predating the divergence between *P. caudatum* and the *aurelia* lineage. The number of new IESs is indicated for each species.

Species codes: pso: *P. sonneborni*, ptr: *P. tredecaurelia*, pte: *P. tetraurelia*, pbi: *P. biaurelia*, poc: *P. octaurelia*, pse: *P. sexaurelia*, ppr: *P. primaurelia*, ppe: *P. pentaurelia*, pca: *P. caudatum*

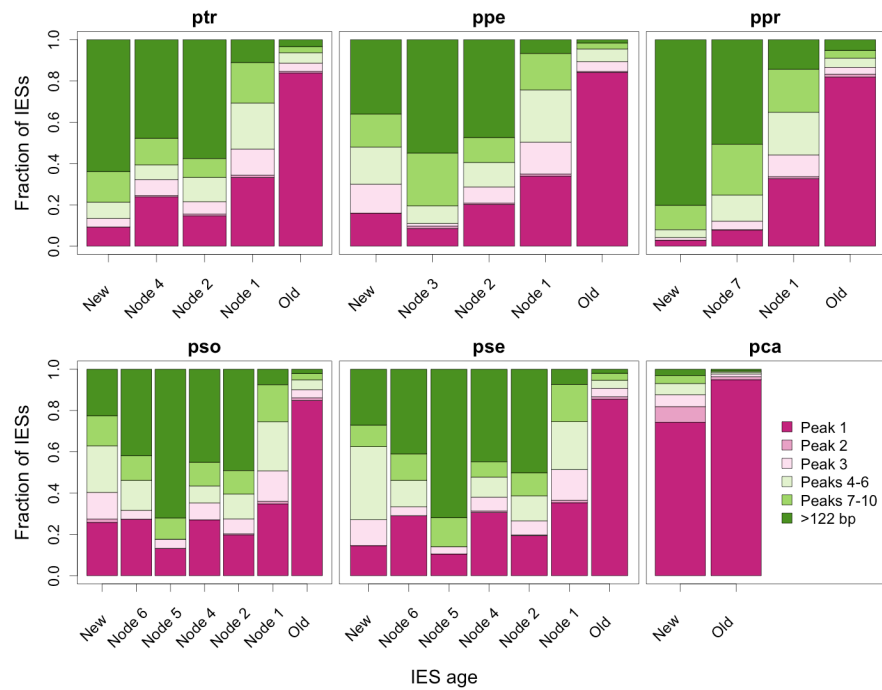

**S8 Fig. Length distribution of IESs according to their age.**

Comparison of the length distribution of IESs according to their age (for the subset of datable IESs located in coding regions). The age of an IES site is defined as in Fig. 3. Results for other species are shown in Fig. 4.

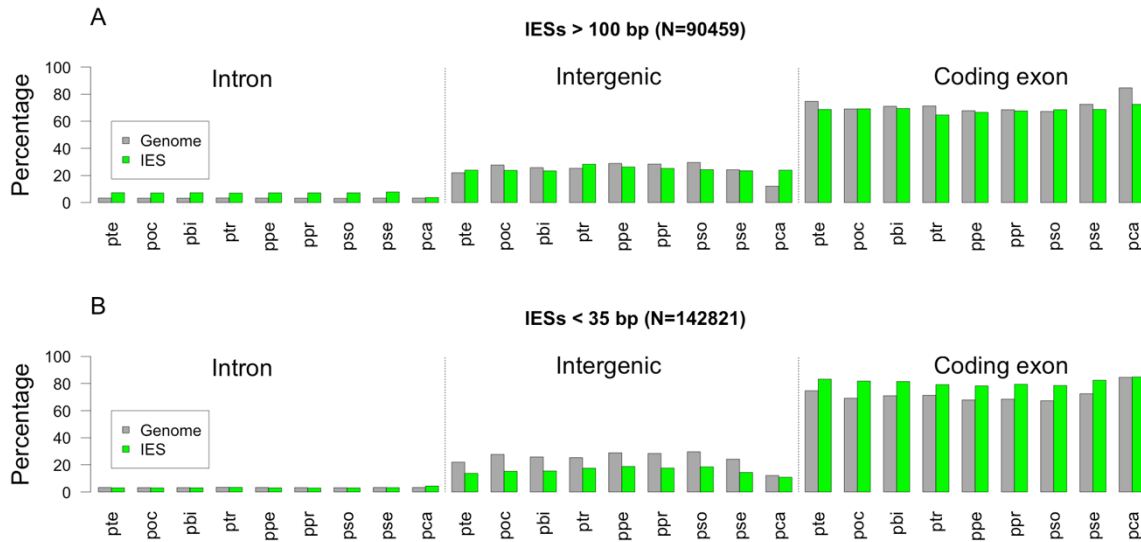

**S9 Fig. Genomic distribution of IESs according to their length.**

Green bars indicate the percentage of IESs located in each compartment of the MAC genome (introns, protein-coding regions, intergenic regions) for each species. Grey bars indicate the percentage of the MAC genome in each compartment. (A) Long IESs (>100 bp). (B) Short IESs (<35 bp).

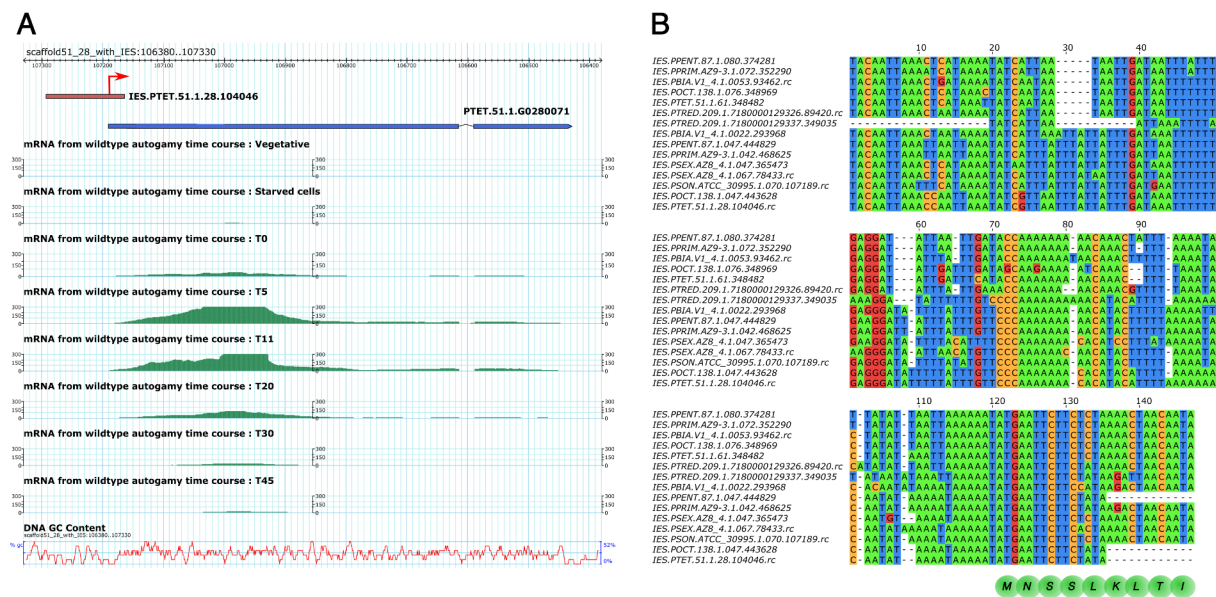

**S10 Fig. A highly conserved IES contributes to the regulation of gene expression.**

The IES family FAM\_9405 is present at the 5' end of a protein-coding gene of unknown function, expressed at a high level, specifically during autogamy. The IES overlaps the beginning of the first exon, including the 5'UTR and the first codons. Excision of the IES during MAC development leads to the loss of the initiation codon and of the promoter region, and thereby to the silencing of this gene in vegetative cells. (A) Gene structure and expression level during autogamy in *P. tetraurelia*. The IES is displayed in red. The position of the translation start site is indicated by a red arrow. (B) Alignment of homologous IESs across *aurelia* species. The N-terminal end of the encoded protein is shown below.



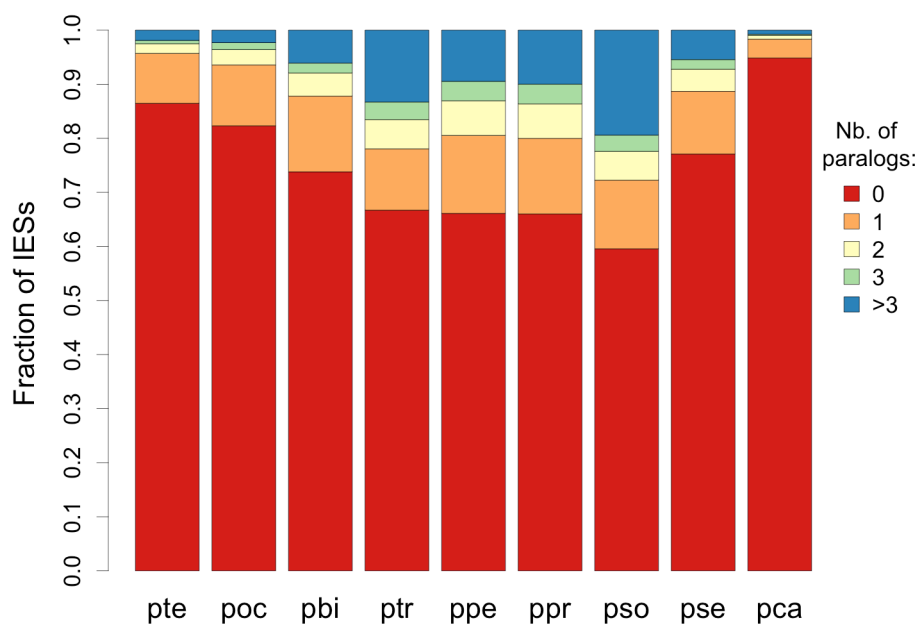

**S11 Fig. The vast majority of IESs correspond to unique sequences.**

For each species, all IESs were compared against each other with BLASTN (with an E-value threshold of  $10^{-5}$ ). The distribution of the number of BLAST hits per IES (excluding self-hits) is displayed for each species.

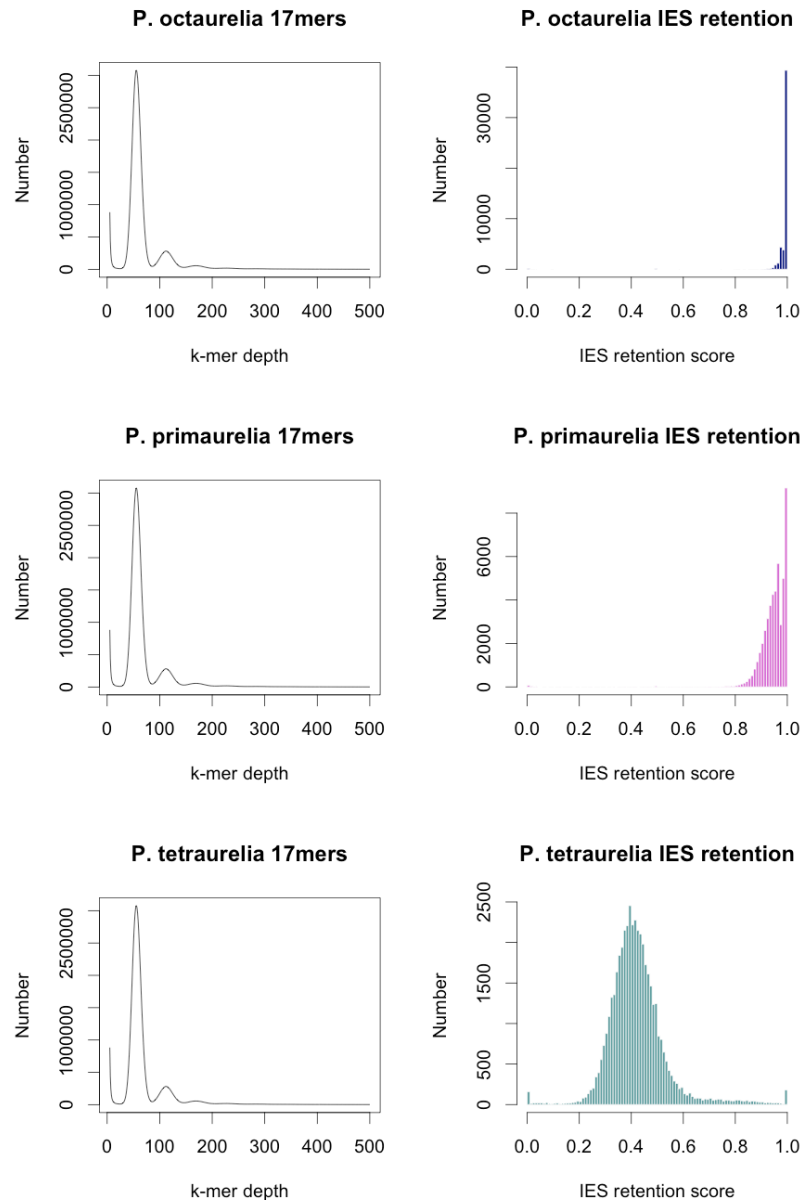

**S12 Fig. Estimating the proportion of MIC and MAC DNA in the sample based on IES retention score.**

The histograms on the left show the k-mer depth profiles. The peak at the origin can be attributed to sequencing errors (k-mers that occur only once or a few times). The position of the largest peak beyond the origin corresponds to k-mers present once in the genome and provides the sequencing depth. As *Paramecium aurelia* genomes have undergone whole genome duplications, there are a significant number of k-mers at 2X and even 4X the sequencing depth arising from genes (or regions of genes) present in 2 or 4 copies, clearly visible for *P. octaurelia* and *P. primaurelia*. The profile for *P. tetraurelia* however has a first peak (MIC sequences that occur once) at 31X followed by a larger peak that is not at the 2X position as it arises because of MAC DNA contamination. The column on the right shows histograms of IES retention scores. Only the *P. tetraurelia* sample is significantly contaminated by MAC DNA: the average IES retention score of 0.4 indicates 40% MIC and 60% MAC DNA in this sample.

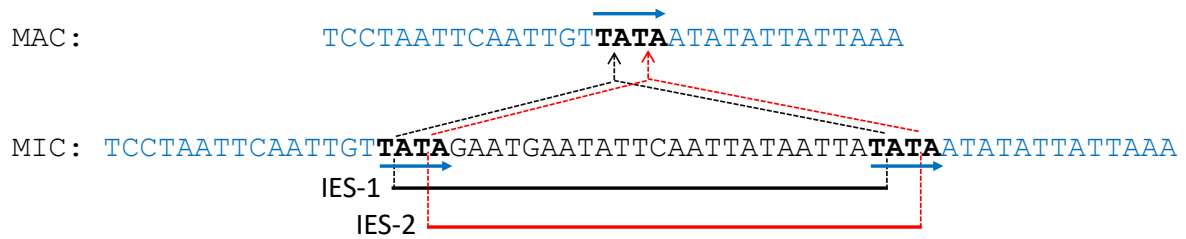

**S13 Fig. Example of floating IES.**

Comparison of MIC and MAC sequences indicates the presence of an IES at this locus. However, because of the presence of a repeated motif at the boundaries of the IES (blue arrows), it is not possible to determine which of the two possible segments (IES-1 in black or IES-2 in red) is actually excised *in vivo*. Such IESs that cannot be unambiguously positioned are called ‘floating IES’. They represent 6.8% of the 400,254 IESs detected across all species. In the vast majority of cases (86%) the alternative locations of floating IESs differ by only two bp (as in the example shown here), and there are less than 1% of floating IESs for which the uncertainty in IES position exceeds 5 bp.

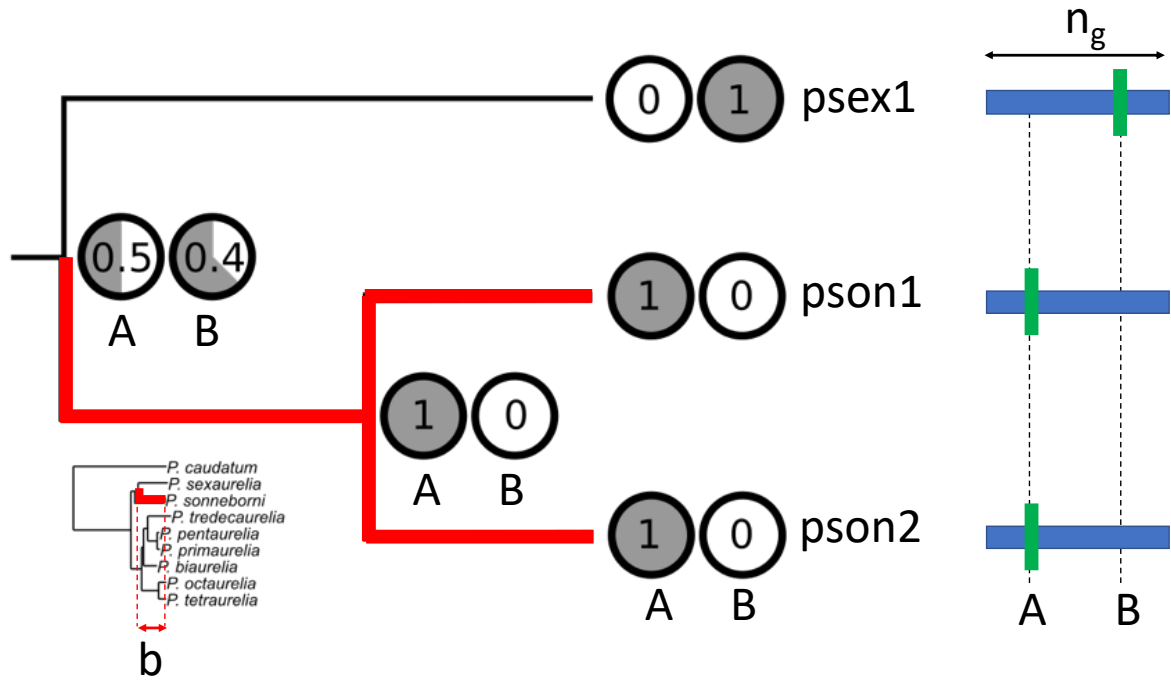

**S14 Fig. Measuring the rate of IES gain or loss along the species phylogeny.**

To illustrate our methodology, we show here an example of a gene family with 3 genes, two from *P. sonneborni* (pson1, pson2) and one from *P. sexaurelia* (psex1). Two IES loci are found in this family (A, B). The probability of presence of an IES (estimated by Bayesian ancestral state reconstruction - see methods) is indicated by shaded circles for each locus at each node of the gene phylogeny. We focus here on the branch of the species tree leading from the common ancestor of *P. sexaurelia* and *P. sonneborni* to the leaf node of *P. sonneborni* (the red branch in the species tree, shown in insert). The length of this branch ( $b$ ), is taken as a proxy for time. Because of a duplication event, this branch of the species tree corresponds to two paths in the gene tree ( $k=2$ ). To estimate the IES gain rate, we calculate for each path the sum of increase in the probability of presence of an IES, for all IES loci ( $p^+$ ). Along the first path (from the root to pson1), we have  $p^+A1=0.5$  and  $p^+B1=0$ . Along the second path (from the root to pson2), we have  $p^+A2=0.5$  and  $p^+B2=0$ . The average gain rate along all paths, per unit of time and per bp, is thus given by  $G=(p^+A1 + p^+B1 + p^+A2 + p^+B2)/(k \times b \times n_g)$ , where  $n_g$  is the number of well aligned sites in the gene family alignment (i.e. the number of sites where the presence of homologous IESs can be assessed). Similarly, to estimate the IES loss rate, we calculate for each path the sum of decrease in the probability of presence of an IES, for all IES loci ( $p^-$ ). Along the first path (from the root to pson1), we have  $p^-A1=0$  and  $p^-B1=0.4$ . Along the second path (from the root to pson2), we have  $p^-A2=0$  and  $p^-B2=0.4$ . The average gain rate along all paths, per unit of time and per bp, is thus given by  $L=(p^-A1 + p^-B1 + p^-A2 + p^-B2)/(k \times b \times I)$ , where  $I$  is the number IES loci in the gene family (here  $I=2$ ).
